# Supplementary material for: Isolation of Highly Pathogenic H5N1 Influenza Viruses in 2009–2013 in Vietnam
Source: Front Microbiol. 2019 Jun 25;10:1411. doi: 10.3389/fmicb.2019.01411 (PMC6603144; doi:10.3389/fmicb.2019.01411)
Supplement: TABLE S2 — Comparison of the consensus sequences of the isolated viruses (the sequence of A/duck/Vietnam/ST1488-1/2012 served as the reference sequence). [file Table_2.xlsx]

## Sheet: PB2
Table S2. Comparison of the consensus sequences of the isolated viruses (the sequence of A/duck/Vietnam/ST1488-1/2012 served as the reference sequence)
Clade	Virus Isolate	Amino Acid Position (PB2)
		65	67	105	107	108	117	147	162	175	176	184	187	195	202	212	221	250	251	261	271	288	312	317	338	339	353	355	357	368	369	381	390	430	463	472	473	478	480	483	490	494	497	508	553	560	575	584	588
1.1.2	A/duck/Vietnam/ST1488-1/2012	E	I	A	S	A	P	I	V	R	I	T	K	D	I	V	T	V	R	I	M	Q	K	M	I	K	R	R	Y	R	K	L	D	T	V	E	M	V	V	M	S	I	S	K	I	V	I	I	A
	A/duck/Vietnam/ST1488-2/2012	.	.	.	.	.	.	.	.	.	.	.	.	.	.	.	.	.	.	.	.	.	.	.	.	.	.	.	.	.	.	.	.	.	.	.	.	.	.	.	.	.	.	.	.	.	.	.	.
	A/duck/Vietnam/ST1488-3/2012	.	.	.	.	.	.	.	.	.	.	.	.	.	.	.	.	.	.	.	.	.	.	.	.	.	.	.	.	.	.	.	.	.	.	.	.	.	.	.	.	.	.	.	.	.	.	.	.
	A/duck/Vietnam/ST1489-1/2012	.	.	.	.	.	.	.	.	.	.	.	.	.	.	.	.	.	.	.	.	.	.	.	.	.	.	.	.	.	.	.	.	.	.	.	.	.	.	.	.	.	.	.	.	.	.	.	.
	A/duck/Vietnam/ST1489-2/2012	.	.	.	.	.	.	.	.	.	.	.	.	.	.	.	.	.	.	.	.	.	.	.	.	.	.	.	.	.	.	.	.	.	.	.	.	.	.	.	.	.	.	.	.	.	.	.	.
	A/duck/Vietnam/ST1489-3/2012	.	.	.	.	.	.	.	.	.	.	.	.	.	.	.	.	.	.	.	.	.	.	.	.	.	.	.	.	.	.	.	.	.	.	.	.	.	.	.	.	.	.	.	.	.	.	.	.
	A/duck/Vietnam/ST1490-1/2012	.	.	.	.	.	.	.	.	.	.	.	.	.	.	.	.	.	.	.	.	.	.	.	.	.	.	.	.	.	.	.	.	.	.	.	.	.	.	.	.	.	.	.	.	.	.	.	.
	A/duck/Vietnam/ST1490-2/2012	.	.	.	.	.	.	.	.	.	.	.	.	.	.	.	.	.	.	.	.	.	.	.	.	.	.	.	.	.	.	.	.	.	.	.	.	.	.	.	.	.	.	.	.	.	.	.	.
	A/duck/Vietnam/ST1490-3/2012	.	.	.	.	.	.	.	.	.	.	.	.	.	.	.	.	.	.	.	.	.	.	.	.	.	.	.	.	.	.	.	.	.	.	.	.	.	.	.	.	.	.	.	.	.	.	.	.
	A/duck/Vietnam/ST1491-1/2012	.	.	.	.	.	.	.	.	.	.	.	.	.	.	.	.	.	.	.	.	.	.	.	.	.	.	.	.	.	.	.	.	.	.	.	.	.	.	.	.	.	.	.	.	.	.	.	.
	A/duck/Vietnam/ST1491-2/2012	.	.	.	.	.	.	.	.	.	.	.	.	.	.	.	.	.	.	.	.	.	.	.	.	.	.	.	.	.	.	.	.	.	.	.	.	.	.	.	.	.	.	.	.	.	.	.	.
	A/duck/Vietnam/ST1491-3/2012	.	.	.	.	.	.	.	.	.	.	.	.	.	.	.	.	.	.	.	.	.	.	.	.	.	.	.	.	.	.	.	.	.	.	.	.	.	.	.	.	.	.	.	.	.	.	.	.
	A/duck/Vietnam/ST1551-3/2012	.	.	.	.	V	T	.	.	.	.	.	.	.	.	.	.	.	.	.	.	K	.	.	.	.	.	.	.	.	.	.	.	.	.	.	.	.	.	T	.	.	.	R	.	.	M	.	.
2.3.2.1a	A/duck/Vietnam/TY165/2010	D	.	T	N	T	T	T	.	.	.	.	.	N	M	.	A	.	.	.	T	.	R	L	V	T	K	.	H	Q	R	.	N	P	I	.	L	.	.	.	.	V	.	R	.	.	M	V	T
	A/duck/Vietnam/TY166/2010	D	.	T	N	T	T	T	.	.	.	.	.	N	M	.	A	.	.	.	T	.	R	L	V	T	K	.	H	Q	R	.	N	P	I	.	L	.	.	.	.	V	.	R	.	.	M	V	T
	A/duck/Vietnam/LS1352/2011	D	.	T	N	T	T	T	.	.	.	.	.	.	M	.	A	.	.	.	T	.	R	L	V	T	K	.	H	Q	R	.	N	P	I	.	L	.	.	.	.	V	N	R	.	.	M	V	T
	A/duck/Vietnam/LS1353/2011	D	.	T	N	T	T	T	I	.	.	.	.	.	M	.	A	.	.	.	T	.	R	L	V	T	K	.	H	Q	R	.	N	P	I	.	L	.	.	.	.	V	N	R	.	.	M	V	T
	A/duck/Vietnam/LS1354/2011	D	.	T	N	T	T	T	I	.	.	.	.	.	M	.	A	.	.	.	T	.	R	L	V	T	K	.	H	Q	R	.	N	P	I	.	L	.	.	.	.	V	N	R	.	.	M	V	T
	A/duck/Vietnam/TY151/2011	D	.	T	N	T	T	T	.	.	.	.	.	.	M	.	A	.	.	.	T	.	R	L	V	T	K	.	H	Q	R	.	N	P	I	.	L	.	.	.	.	V	N	R	.	.	M	V	T
	A/duck/Vietnam/TY152/2011	D	.	T	N	T	T	T	I	.	.	.	.	.	M	.	A	.	.	.	T	.	R	L	V	T	K	.	H	Q	R	.	N	P	I	.	L	.	.	.	.	V	N	R	.	.	M	V	T
	A/duck/Vietnam/QT1455-1/2012	D	.	T	N	T	T	T	.	.	.	.	.	.	M	.	A	.	.	T	T	.	R	L	V	T	K	.	H	Q	R	.	N	P	I	.	L	.	.	.	.	V	.	R	.	.	M	V	T
	A/duck/Vietnam/QT1455-2/2012	D	.	T	N	T	T	T	.	.	.	.	.	.	M	.	A	.	.	T	T	.	R	L	V	T	K	.	H	Q	R	.	N	P	I	.	L	.	.	.	.	V	.	R	.	.	M	V	T
	A/duck/Vietnam/QT1455-3/2012	D	.	T	N	T	T	T	.	.	.	.	.	.	M	.	A	.	.	T	T	.	R	L	V	T	K	.	H	Q	R	.	N	P	I	.	L	.	.	.	.	V	.	R	.	.	M	V	T
	A/duck/Vietnam/QT1456-1/2012	D	.	T	N	T	T	T	.	.	.	.	.	.	M	.	A	A	.	T	T	.	R	L	V	T	K	.	H	Q	R	.	N	P	I	.	L	.	.	.	.	V	.	R	.	.	M	V	T
	A/duck/Vietnam/QT1456-2/2012	D	.	T	N	T	T	T	.	.	.	.	.	.	M	.	A	.	.	T	T	.	R	L	V	T	K	.	H	Q	R	.	N	P	I	.	L	.	.	.	.	V	.	R	.	.	M	V	T
	A/duck/Vietnam/QT1456-3/2012	D	.	T	N	T	T	T	.	.	.	.	.	.	M	.	A	.	.	T	T	.	R	L	V	T	K	.	H	Q	R	.	N	P	I	.	L	.	.	.	.	V	.	R	.	.	M	V	T
	A/duck/Vietnam/QT1457-1/2012	D	.	T	N	T	T	T	.	.	.	.	.	.	M	.	A	.	.	T	T	.	R	L	V	T	K	.	H	Q	R	.	N	P	I	.	L	.	.	K	.	V	.	R	.	.	M	V	T
	A/duck/Vietnam/QT1457-2/2012	D	.	T	N	T	T	T	.	.	.	.	.	.	M	.	A	.	.	T	T	.	R	L	V	T	K	.	H	Q	R	.	N	P	I	.	L	.	.	.	.	V	.	R	.	.	M	V	T
	A/duck/Vietnam/QT1457-3/2012	D	.	T	N	T	T	T	.	.	.	.	.	.	M	.	A	.	.	T	T	.	R	L	V	T	K	.	H	Q	R	.	N	P	I	.	L	.	.	.	.	V	.	R	.	.	M	V	T
	A/duck/Vietnam/QT1458-1/2012	D	.	T	N	T	T	T	.	.	.	.	.	.	M	.	A	.	.	T	T	.	R	L	.	T	K	.	H	Q	R	.	N	P	I	.	L	.	.	.	.	V	.	R	.	.	M	V	T
	A/duck/Vietnam/QT1458-2/2012*
	A/duck/Vietnam/QT1458-3/2012	D	.	T	N	T	T	T	.	.	.	.	.	.	M	.	A	.	.	T	T	.	R	L	V	T	K	.	H	Q	R	.	N	P	I	.	L	.	.	.	.	V	.	R	.	.	M	V	T
	A/duck/Vietnam/QT1479/2012*
	A/duck/Vietnam/QT1480/2012	D	.	T	N	T	T	T	.	.	M	.	.	.	M	.	A	.	.	T	T	.	R	L	V	T	K	.	H	Q	R	.	N	P	I	.	L	.	.	.	.	V	.	R	.	.	M	V	T
	A/duck/Vietnam/QT1481/2012	D	.	T	N	T	T	T	.	.	M	.	.	.	M	.	A	.	.	T	T	.	R	L	V	T	K	.	H	Q	R	.	N	P	I	.	L	.	.	.	.	V	.	R	.	.	M	V	T
	A/duck/Vietnam/QT1483/2012	D	.	T	N	T	T	T	.	.	M	.	.	.	M	.	A	.	.	T	T	.	R	L	V	T	K	.	H	Q	R	.	N	P	I	.	L	.	.	.	.	V	.	R	.	.	M	V	T
	A/duck/Vietnam/QT1484/2012	D	V	T	N	T	T	T	.	I	.	A	.	.	M	.	A	.	.	.	T	.	R	L	V	T	K	.	H	Q	R	.	N	P	I	.	L	.	.	.	N	V	N	R	V	.	M	V	T
2.3.2.1b	A/duck/Vietnam/LS1349/2011	D	.	T	N	T	T	T	.	.	.	.	.	.	M	.	A	.	.	.	T	.	R	L	V	T	K	.	H	Q	R	.	N	P	I	G	L	.	I	.	.	V	.	R	.	.	M	V	T
2.3.2.1c	A/swallow/Vietnam/NT22/2013	D	.	T	N	T	T	T	.	.	.	.	.	.	M	.	A	.	.	.	T	.	R	L	V	T	K	.	H	Q	R	M	N	P	I	.	L	.	.	.	.	V	N	R	.	.	M	V	T
	A/swallow/Vietnam/NT24/2013	D	.	T	N	T	T	T	.	.	.	.	.	.	M	.	A	.	.	.	T	.	R	L	V	T	K	.	H	Q	R	M	N	P	I	.	L	.	.	.	.	V	N	R	.	.	M	V	T
	A/swallow/Vietnam/NT25/2013	D	.	T	N	T	T	T	.	.	.	.	.	.	M	.	A	.	.	.	T	.	R	L	V	T	K	.	H	Q	R	M	N	P	I	.	L	.	.	.	.	V	N	R	.	.	M	V	T
	A/muscovy duck/Vietnam/BG80-1/2013	D	.	T	D	T	T	T	.	.	.	.	R	.	M	.	A	.	.	.	T	.	R	L	V	T	K	K	H	Q	R	.	N	P	I	.	L	.	I	.	.	V	.	R	.	.	M	V	T
	A/muscovy duck/Vietnam/BG80-2/2013	D	.	T	D	T	T	T	.	.	.	.	R	.	M	.	A	.	.	.	T	.	R	L	V	T	K	K	H	Q	R	.	N	P	I	.	L	.	I	.	.	V	.	R	.	.	M	V	T
	A/duck/Vietnam/QT1726/2013	D	.	T	N	T	T	T	.	.	.	.	.	.	M	.	A	.	.	.	T	.	R	L	V	T	K	.	H	Q	R	.	N	P	I	.	L	.	.	.	.	V	N	R	.	.	M	V	T
	A/duck/Vietnam/QT1727/2013	D	.	T	N	T	T	T	.	.	.	.	.	.	M	.	A	.	.	.	T	.	R	L	V	T	K	.	H	Q	R	.	N	P	I	.	L	.	.	.	.	V	N	R	.	.	M	V	T
	A/duck/Vietnam/QT1728/2013	D	.	T	N	T	T	T	.	.	.	.	.	.	M	.	A	.	.	.	T	.	R	L	V	T	K	.	H	Q	R	.	N	P	I	.	L	.	.	.	.	V	N	R	.	.	M	V	T
	A/duck/Vietnam/QT1729/2013	D	.	T	N	T	T	T	.	.	.	.	.	.	M	.	A	.	.	.	T	.	R	L	V	T	K	.	H	Q	R	.	N	P	I	.	L	.	.	.	.	V	N	R	.	.	M	V	T
	A/duck/Vietnam/QT1730/2013	D	.	T	N	T	T	T	.	.	.	.	.	.	M	.	A	.	.	.	T	.	R	L	V	T	K	.	H	Q	R	.	N	P	I	.	L	.	.	.	.	V	N	R	.	.	M	V	T
	A/duck/Vietnam/LS101/2013	D	.	T	D	T	T	T	.	.	.	.	R	.	M	.	A	.	.	.	T	.	R	L	V	T	K	K	H	Q	R	.	N	P	I	.	L	.	I	.	.	V	.	R	.	.	M	V	T
	A/muscovy duck/Vietnam/LS154/2013	D	.	T	D	T	T	T	.	.	.	.	R	.	M	.	A	.	.	.	T	.	R	L	V	T	K	K	H	Q	R	.	N	P	I	.	L	.	I	.	.	V	.	R	.	.	M	V	T
2.3.4.1	A/chicken/Vietnam/QT517/2009	.	.	T	.	T	T	T	.	.	.	.	.	.	M	.	A	.	.	.	T	.	.	L	V	M	K	.	H	Q	R	.	N	P	I	.	.	I	.	.	.	V	.	R	.	L	M	V	.
	A/chicken/Vietnam/TY167/2010	.	.	T	.	T	T	T	.	.	.	.	.	.	M	I	A	.	K	.	T	.	.	L	V	M	K	.	H	Q	R	.	N	P	I	.	.	I	.	.	.	V	.	R	.	L	M	V	.
	A/chicken/Vietnam/TY168/2010	.	.	T	.	T	T	T	.	.	.	.	.	.	M	I	A	.	K	.	T	.	.	L	V	M	K	.	H	Q	R	.	N	P	I	.	.	I	.	.	.	V	.	R	.	L	M	V	.
	*No sequencing data obtained
[truncated: 9 more columns]

## Sheet: PB1
Table S2. Comparison of the consensus sequences of the isolated viruses (the sequence of A/duck/Vietnam/ST1488-1/2012 served as the reference sequence)
Clade	Virus Isolate	Amino Acid Position (PB1)
		2	20	33	38	52	54	55	56	57	113	114	132	171	174	182	191	195	215	261	298	314	328	361	368	372	384	386	387	391	398	400	435	451	456	459	480	525	528	577	584	618	633	635	644	680	702	733	736
1.1.2	A/duck/Vietnam/ST1488-1/2012	D	T	G	Y	K	K	W	T	T	I	V	T	M	M	T	V	M	K	C	I	N	N	S	I	M	L	K	K	K	D	T	T	V	H	I	K	I	T	R	R	V	S	K	I	R	S	G	K
	A/duck/Vietnam/ST1488-2/2012	.	.	.	.	.	.	.	.	.	.	.	.	.	.	.	.	.	.	.	.	.	.	.	.	.	.	.	.	.	.	.	.	.	.	.	.	.	.	.	.	.	.	.	.	.	.	.	.
	A/duck/Vietnam/ST1488-3/2012	.	.	.	.	.	.	.	.	.	.	.	.	.	.	.	.	.	.	.	.	.	.	.	.	.	.	.	.	.	.	.	.	.	.	.	.	.	.	.	.	.	.	.	.	.	.	.	.
	A/duck/Vietnam/ST1489-1/2012	.	.	.	.	.	.	.	.	.	.	.	.	.	.	.	.	.	.	.	.	.	.	N	.	.	.	.	.	.	.	.	.	.	.	.	.	.	.	.	.	.	.	.	.	.	.	.	.
	A/duck/Vietnam/ST1489-2/2012	.	.	.	.	.	.	.	.	.	.	.	.	.	.	.	.	.	.	.	.	.	.	N	.	.	.	.	.	.	.	.	.	.	.	.	.	.	.	.	.	.	.	.	.	.	.	.	.
	A/duck/Vietnam/ST1489-3/2012	.	.	.	.	.	.	.	.	.	.	.	.	.	.	.	.	.	.	.	.	.	.	N	.	.	.	.	.	.	.	.	.	.	.	.	.	.	.	.	.	.	.	.	.	.	.	.	.
	A/duck/Vietnam/ST1490-1/2012	.	.	.	.	.	.	.	.	.	.	.	.	.	.	.	.	.	.	.	.	.	.	.	.	.	.	.	.	.	.	.	.	.	.	.	.	.	.	.	.	.	.	.	.	.	.	.	.
	A/duck/Vietnam/ST1490-2/2012	.	.	.	.	.	.	.	.	.	.	.	.	.	.	.	.	.	.	.	.	.	.	.	.	.	.	.	.	.	.	.	.	.	.	.	.	.	.	.	.	.	.	.	.	.	.	.	.
	A/duck/Vietnam/ST1490-3/2012	.	.	.	.	.	.	.	.	.	.	.	.	.	.	.	.	.	.	.	.	.	.	.	.	.	.	.	.	.	.	.	.	.	.	.	.	.	.	.	.	.	.	.	.	.	.	.	.
	A/duck/Vietnam/ST1491-1/2012	.	.	.	.	.	.	.	.	.	.	.	.	.	.	.	.	.	.	.	.	.	.	.	.	.	.	.	.	.	.	.	.	.	.	.	.	.	.	.	.	.	.	.	.	.	.	.	.
	A/duck/Vietnam/ST1491-2/2012	.	.	.	.	.	.	.	.	.	.	.	.	.	.	.	.	.	.	.	.	.	.	.	.	.	.	.	.	.	.	.	.	.	.	.	.	.	.	.	.	.	.	.	.	.	.	.	.
	A/duck/Vietnam/ST1491-3/2012	.	.	.	.	.	.	.	.	.	.	.	.	.	.	.	.	.	.	.	.	.	.	.	.	.	.	.	.	.	.	.	.	.	.	.	.	.	.	.	.	.	.	.	.	.	.	.	.
	A/duck/Vietnam/ST1551-3/2012	.	.	.	.	.	.	.	.	.	.	.	.	.	.	.	.	.	.	.	L	.	.	.	.	.	.	.	.	.	.	.	.	.	.	.	.	.	.	.	.	.	.	.	.	.	.	.	.
2.3.2.1a	A/duck/Vietnam/TY165/2010	.	.	.	.	.	E	.	.	.	.	.	.	.	.	.	.	.	R	S	L	.	.	.	.	.	I	.	.	.	.	.	.	.	.	.	.	V	.	K	.	E	.	R	.	.	R	.	.
	A/duck/Vietnam/TY166/2010	.	.	.	.	.	E	.	.	.	.	.	.	.	.	.	.	.	R	S	L	.	.	.	.	.	I	.	.	.	.	.	.	G	.	.	.	V	.	K	.	E	.	R	.	.	.	.	.
	A/duck/Vietnam/LS1352/2011	.	.	.	.	.	E	.	A	.	.	.	.	.	.	.	.	.	R	S	L	.	.	.	.	.	I	.	.	.	.	.	.	.	.	.	.	V	.	K	.	E	.	R	.	.	.	.	.
	A/duck/Vietnam/LS1353/2011	.	.	.	.	.	E	.	A	.	.	.	.	.	.	.	.	.	R	S	L	.	.	.	.	.	I	.	.	.	.	.	.	.	.	.	.	V	.	K	.	E	.	R	.	.	.	.	.
	A/duck/Vietnam/LS1354/2011	.	.	.	.	.	E	.	A	.	.	.	.	.	.	.	.	.	R	S	L	.	.	.	.	.	I	.	.	.	.	.	.	.	.	.	.	V	.	K	.	E	.	R	.	.	.	.	.
	A/duck/Vietnam/TY151/2011	.	.	.	.	.	E	.	A	.	.	.	.	.	.	.	.	.	R	S	L	.	.	.	.	.	I	.	.	.	.	.	.	.	.	.	.	V	.	K	.	E	.	R	.	.	.	.	.
	A/duck/Vietnam/TY152/2011	.	.	.	.	.	E	.	A	.	.	.	.	.	.	.	.	.	R	S	L	.	.	.	.	.	I	.	.	.	.	.	.	.	.	.	.	V	.	K	.	E	.	R	.	.	.	.	.
	A/duck/Vietnam/QT1455-1/2012	.	.	.	.	.	E	.	.	.	.	.	.	.	.	I	.	.	R	S	L	S	.	.	.	.	I	.	.	.	.	.	.	.	.	.	.	V	.	K	.	E	N	R	.	.	.	.	.
	A/duck/Vietnam/QT1455-2/2012	.	.	.	.	.	E	.	.	.	.	.	.	.	.	I	.	.	R	S	L	S	.	.	.	.	I	.	.	.	.	.	.	.	.	.	.	V	.	K	.	E	N	R	.	.	.	.	.
	A/duck/Vietnam/QT1455-3/2012	.	.	.	.	.	E	.	.	.	.	.	.	.	.	I	.	.	R	S	L	S	.	.	.	.	I	.	.	.	.	.	.	.	.	.	.	V	.	K	.	E	N	R	.	.	.	.	.
	A/duck/Vietnam/QT1456-1/2012	.	.	.	.	.	E	.	.	.	.	.	.	.	.	I	.	.	R	S	L	S	.	.	.	.	I	.	.	.	.	.	.	.	.	.	.	V	.	K	.	E	N	R	.	.	.	.	.
	A/duck/Vietnam/QT1456-2/2012	.	.	.	.	.	E	.	.	.	.	.	.	.	.	I	.	.	R	S	L	S	.	.	.	.	I	.	.	.	.	.	.	.	.	.	.	V	.	K	.	E	N	R	.	.	.	.	.
	A/duck/Vietnam/QT1456-3/2012	.	.	.	.	.	E	.	.	.	.	.	.	.	.	I	.	.	R	S	L	S	.	.	.	.	I	.	.	.	.	.	.	.	.	.	.	V	.	K	.	E	N	R	.	.	.	.	.
	A/duck/Vietnam/QT1457-1/2012	.	.	.	.	.	E	.	.	.	.	.	.	.	.	I	.	.	R	S	L	S	.	.	.	.	I	.	.	.	.	.	.	.	.	.	.	V	.	K	.	E	N	R	.	.	.	.	.
	A/duck/Vietnam/QT1457-2/2012	.	.	.	.	.	E	.	.	.	.	.	.	.	.	I	.	.	R	S	L	S	.	.	.	.	I	.	.	.	.	.	.	.	.	.	.	V	.	K	.	E	N	R	.	.	.	.	.
	A/duck/Vietnam/QT1457-3/2012	.	.	.	.	.	E	.	.	.	.	.	.	.	.	I	.	.	R	S	L	S	.	.	.	.	I	.	.	.	.	.	.	.	.	.	.	V	.	K	.	E	N	R	.	.	.	.	.
	A/duck/Vietnam/QT1458-1/2012	.	.	.	.	.	E	.	.	.	.	.	.	.	.	I	.	.	R	S	L	S	.	.	.	.	I	.	.	.	.	.	.	.	.	.	.	V	.	K	.	E	N	R	.	.	.	.	.
	A/duck/Vietnam/QT1458-2/2012*
	A/duck/Vietnam/QT1458-3/2012	.	.	.	.	.	E	.	.	.	.	.	.	.	.	I	.	.	R	S	L	S	.	.	.	.	I	.	.	.	.	.	.	.	.	.	.	V	.	K	.	E	N	R	.	.	.	.	.
	A/duck/Vietnam/QT1479/2012*
	A/duck/Vietnam/QT1480/2012	.	.	.	.	.	E	.	.	.	.	I	.	.	.	I	.	.	R	S	L	S	.	.	.	.	I	.	.	.	.	.	.	.	.	.	.	V	.	K	.	E	N	R	.	.	.	.	.
	A/duck/Vietnam/QT1481/2012	.	.	.	.	.	E	L	.	.	.	I	.	.	.	I	.	.	R	S	L	S	.	.	.	.	I	.	.	.	.	.	.	.	.	.	.	V	.	K	.	E	N	R	.	.	.	.	.
	A/duck/Vietnam/QT1483/2012	.	.	.	.	.	E	.	.	.	.	.	.	.	.	I	.	.	R	S	L	S	.	.	.	.	I	.	.	.	.	.	.	.	.	.	.	V	.	K	.	E	N	R	.	.	.	.	.
	A/duck/Vietnam/QT1484/2012	.	.	.	.	.	E	.	.	.	.	.	.	.	.	.	.	.	R	S	L	.	.	.	.	.	I	R	.	.	.	.	.	.	.	.	.	V	.	K	.	E	.	R	.	.	.	R	N
2.3.2.1b	A/duck/Vietnam/LS1349/2011	.	.	.	.	.	E	.	.	.	.	I	.	.	.	.	.	.	R	S	L	.	.	.	.	I	.	.	.	.	.	A	.	.	.	.	.	.	.	K	.	E	.	R	.	.	.	.	.
2.3.2.1c	A/swallow/Vietnam/NT22/2013	.	.	.	.	R	E	.	.	.	.	.	A	.	.	.	.	.	R	S	L	.	.	.	.	.	.	.	R	R	.	.	.	.	Y	V	R	.	.	K	.	E	.	R	M	.	.	.	.
	A/swallow/Vietnam/NT24/2013	.	.	.	.	R	E	.	.	.	.	.	.	.	L	.	.	.	R	S	L	.	.	.	.	.	.	.	R	R	.	.	.	.	Y	V	R	.	.	K	.	E	.	R	M	.	.	.	.
	A/swallow/Vietnam/NT25/2013	.	.	.	.	R	E	.	.	.	.	.	.	.	.	.	.	.	R	S	L	.	.	.	.	.	.	.	R	R	.	.	.	.	Y	V	R	.	.	K	.	E	.	R	M	.	.	.	.
	A/muscovy duck/Vietnam/BG80-1/2013	.	.	.	.	.	E	.	.	.	.	.	.	.	.	.	.	.	R	S	L	.	.	.	.	.	.	.	.	R	.	.	.	.	.	.	.	.	.	K	.	E	.	R	M	.	.	.	.
	A/muscovy duck/Vietnam/BG80-2/2013	.	.	.	.	.	E	.	.	.	.	.	.	.	.	.	.	.	R	S	L	.	.	.	.	.	.	.	R	R	.	.	.	.	.	.	.	.	.	K	.	E	.	R	M	.	.	.	.
	A/duck/Vietnam/QT1726/2013	.	.	.	.	.	V	.	.	.	V	.	.	.	.	.	.	.	R	S	L	.	.	.	.	.	.	.	R	R	.	.	.	.	.	.	.	.	.	K	H	E	.	R	M	.	.	.	.
	A/duck/Vietnam/QT1727/2013	N	.	.	.	.	G	.	.	.	V	.	.	.	.	.	.	.	R	S	L	.	.	.	.	.	.	.	R	R	.	.	.	.	.	.	.	.	.	K	H	E	.	R	M	.	.	.	.
	A/duck/Vietnam/QT1728/2013	.	.	.	.	.	G	.	.	.	V	.	.	.	.	.	.	.	R	S	L	.	.	.	.	.	.	.	R	R	.	.	.	.	.	.	.	.	.	K	H	E	.	R	M	.	.	.	.
	A/duck/Vietnam/QT1729/2013	.	.	.	.	.	G	.	.	.	V	.	.	.	.	.	.	.	R	S	L	.	.	.	.	.	.	.	R	R	.	.	.	.	.	.	.	.	.	K	H	E	.	R	M	.	.	.	.
	A/duck/Vietnam/QT1730/2013	.	.	.	.	.	G	.	.	.	V	.	.	.	.	.	.	.	R	S	L	.	.	.	.	.	.	.	R	R	.	.	.	.	.	.	.	.	.	K	H	E	.	R	M	.	.	.	.
	A/duck/Vietnam/LS101/2013	.	.	.	.	.	E	.	.	.	.	.	.	.	.	.	.	.	R	S	L	.	.	.	.	.	.	.	.	R	.	.	.	.	.	.	.	.	.	K	.	E	.	R	M	.	.	.	.
	A/muscovy duck/Vietnam/LS154/2013	.	.	W	.	.	E	.	.	.	.	.	.	.	.	.	.	.	R	S	L	.	.	.	.	.	.	.	.	R	.	.	I	.	.	.	.	.	.	K	.	E	.	R	M	.	.	.	.
2.3.4.1	A/chicken/Vietnam/QT517/2009	.	S	.	H	.	.	.	.	I	.	.	.	V	.	.	L	I	R	S	L	S	.	.	V	.	.	.	R	.	E	.	.	.	.	.	.	.	.	K	.	E	.	.	.	K	.	.	.
	A/chicken/Vietnam/TY167/2010	.	S	.	.	.	.	.	.	M	.	.	.	.	.	.	L	I	R	S	L	S	K	.	V	.	S	.	.	.	E	.	.	.	.	.	.	.	S	K	.	E	.	.	.	K	.	.	.
	A/chicken/Vietnam/TY168/2010	.	S	.	.	.	.	.	.	M	.	.	.	.	.	.	L	I	R	S	L	S	K	.	V	.	S	.	.	.	E	.	.	.	.	.	.	.	S	K	.	E	.	.	.	K	.	.	.
	*No sequencing data obtained
[truncated: 4 more columns]

## Sheet: PB1-F2
Table S2. Comparison of the consensus sequences of the isolated viruses (the sequence of A/duck/Vietnam/ST1488-1/2012 served as the reference sequence)
Clade	Virus Isolate	Amino Acid Position (PB1-F2)
		1	2	6	11	15	18	21	22	23	24	26	37	44	46	58	59	66	67	70	74	75	81	83	87
1.1.2	A/duck/Vietnam/ST1488-1/2012	M	E	G	R	H	T	R	G	S	G	Q	L	K	M	W	R	S	L	G	T	H	R	F	E
	A/duck/Vietnam/ST1488-2/2012	.	.	.	.	.	.	.	.	.	.	.	.	.	.	.	.	.	.	.	.	.	.	.	.
	A/duck/Vietnam/ST1488-3/2012	.	.	.	.	.	.	.	.	.	.	.	.	.	.	.	.	.	.	.	.	.	.	.	.
	A/duck/Vietnam/ST1489-1/2012	.	.	.	.	.	.	.	.	.	.	.	.	.	.	.	.	.	.	.	.	.	.	.	.
	A/duck/Vietnam/ST1489-2/2012	.	.	.	.	.	.	.	.	.	.	.	.	.	.	.	.	.	.	.	.	.	.	.	.
	A/duck/Vietnam/ST1489-3/2012	.	.	.	.	.	.	.	.	.	.	.	.	.	.	.	.	.	.	.	.	.	.	.	.
	A/duck/Vietnam/ST1490-1/2012	.	.	.	.	.	.	.	.	.	.	.	.	.	.	.	.	.	.	.	.	.	.	.	.
	A/duck/Vietnam/ST1490-2/2012	.	.	.	.	.	.	.	.	.	.	.	.	.	.	.	.	.	.	.	.	.	.	.	.
	A/duck/Vietnam/ST1490-3/2012	.	.	.	.	.	.	.	.	.	.	.	.	.	.	.	.	.	.	.	.	.	.	.	.
	A/duck/Vietnam/ST1491-1/2012	.	.	.	.	.	.	.	.	.	.	.	.	.	.	.	.	.	.	.	.	.	.	.	.
	A/duck/Vietnam/ST1491-2/2012	.	.	.	.	.	.	.	.	.	.	.	.	.	.	.	.	.	.	.	.	.	.	.	.
	A/duck/Vietnam/ST1491-3/2012	.	.	.	.	.	.	.	.	.	.	.	.	.	.	.	.	.	.	.	.	.	.	.	.
	A/duck/Vietnam/ST1551-3/2012	.	.	D	.	.	.	.	.	.	.	.	.	.	.	.	K	.	.	.	.	.	K	.	.
2.3.2.1a	A/duck/Vietnam/TY165/2010	.	.	.	Q	.	I	.	.	.	.	.	R	R	T	.	K	N	P	E	I	R	K	.	.
	A/duck/Vietnam/TY166/2010	.	.	.	Q	.	I	.	.	.	.	.	R	R	T	.	K	N	P	E	I	R	K	.	.
	A/duck/Vietnam/LS1352/2011	.	.	.	Q	.	I	.	.	.	.	.	R	R	T	.	K	N	P	E	I	R	K	.	.
	A/duck/Vietnam/LS1353/2011	.	.	.	Q	.	I	.	.	.	.	.	R	R	T	.	K	N	P	E	I	R	K	.	.
	A/duck/Vietnam/LS1354/2011	.	.	.	Q	.	I	.	.	.	.	.	R	R	T	.	K	N	P	E	I	R	K	.	.
	A/duck/Vietnam/TY151/2011	.	.	.	Q	.	I	.	.	.	.	.	R	R	T	.	K	N	P	E	I	R	K	.	.
	A/duck/Vietnam/TY152/2011	.	.	.	Q	.	I	.	.	.	.	.	R	R	T	.	K	N	P	E	I	R	K	.	.
	A/duck/Vietnam/QT1455-1/2012	.	.	.	Q	.	I	.	.	.	.	.	R	R	T	.	K	N	P	E	I	R	K	.	.
	A/duck/Vietnam/QT1455-2/2012	.	.	.	Q	.	I	.	.	.	.	.	R	R	T	.	K	N	P	E	I	R	K	.	.
	A/duck/Vietnam/QT1455-3/2012	.	.	.	Q	.	I	.	.	.	.	.	R	R	T	.	K	N	P	E	I	R	K	.	.
	A/duck/Vietnam/QT1456-1/2012	.	.	.	Q	.	I	.	.	.	.	.	R	R	T	.	K	N	P	E	I	R	K	.	.
	A/duck/Vietnam/QT1456-2/2012	.	.	.	Q	.	I	.	.	.	.	.	R	R	T	.	K	N	P	E	I	R	K	.	.
	A/duck/Vietnam/QT1456-3/2012	.	.	.	Q	.	I	.	.	.	.	.	R	R	T	.	K	N	P	E	I	R	K	.	.
	A/duck/Vietnam/QT1457-1/2012	.	.	.	Q	.	I	.	.	.	.	.	R	R	T	.	K	N	P	E	I	R	K	.	.
	A/duck/Vietnam/QT1457-2/2012	.	.	.	Q	.	I	.	.	.	.	.	R	R	T	.	K	N	P	E	I	R	K	.	.
	A/duck/Vietnam/QT1457-3/2012	.	.	.	Q	.	I	.	.	.	.	.	R	R	T	.	K	N	P	E	I	R	K	.	.
	A/duck/Vietnam/QT1458-1/2012	.	.	.	Q	.	I	.	.	.	.	.	R	R	T	.	K	N	P	E	I	R	K	.	.
	A/duck/Vietnam/QT1458-2/2012*
	A/duck/Vietnam/QT1458-3/2012	.	.	.	Q	.	I	.	.	.	.	.	R	R	T	.	K	N	P	E	I	R	K	.	.
	A/duck/Vietnam/QT1479/2012*
	A/duck/Vietnam/QT1480/2012	.	.	.	Q	.	I	.	.	.	.	.	R	R	T	.	K	N	P	E	I	R	K	.	.
	A/duck/Vietnam/QT1481/2012	.	.	.	Q	.	I	.	.	.	Stop
	A/duck/Vietnam/QT1483/2012	.	.	.	Q	.	I	.	.	.	.	.	R	R	T	.	K	N	P	E	I	R	K	.	.
	A/duck/Vietnam/QT1484/2012	.	.	.	Q	.	I	.	.	.	.	.	R	R	T	.	K	N	P	E	I	R	K	.	.
2.3.2.1b	A/duck/Vietnam/LS1349/2011	.	.	.	Q	.	I	.	.	.	.	.	R	R	T	Stop
2.3.2.1c	A/swallow/Vietnam/NT22/2013	.	.	.	Q	.	I	G	E	.	.	.	R	R	T	Stop
	A/swallow/Vietnam/NT24/2013	.	.	.	Q	.	I	G	.	.	.	.	R	R	T	Stop
	A/swallow/Vietnam/NT25/2013	.	.	.	Q	.	I	G	.	.	.	.	R	R	T	Stop
	A/muscovy duck/Vietnam/BG80-1/2013	.	G	.	Q	.	I	.	.	.	.	.	R	R	T	Stop
	A/muscovy duck/Vietnam/BG80-2/2013	.	G	.	Q	.	I	.	.	.	.	.	R	R	T	Stop
	A/duck/Vietnam/QT1726/2013	.	.	.	Q	.	I	.	.	C	.	.	R	R	T	.	K	N	P	E	I	R	K	S	G
	A/duck/Vietnam/QT1727/2013	.	.	.	Q	.	I	.	.	G	.	.	R	R	T	.	K	N	P	E	I	R	K	S	G
	A/duck/Vietnam/QT1728/2013	.	.	.	Q	.	I	.	.	G	.	.	R	R	T	.	K	N	P	E	I	R	K	S	G
	A/duck/Vietnam/QT1729/2013	.	.	.	Q	.	I	.	.	G	.	.	R	R	T	.	K	N	P	E	I	R	K	S	G
	A/duck/Vietnam/QT1730/2013	.	.	.	Q	.	I	.	.	G	.	.	R	R	T	.	K	N	P	E	I	R	K	S	G
	A/duck/Vietnam/LS101/2013	.	G	.	Q	.	I	.	.	.	.	.	R	R	T	Stop
	A/muscovy duck/Vietnam/LS154/2013	I	G	.	Q	.	I	.	.	.	.	.	R	R	T	Stop
2.3.4.1	A/chicken/Vietnam/QT517/2009	.	.	.	Q	R	I	.	E	.	.	Stop
	A/chicken/Vietnam/TY167/2010	.	.	.	Q	R	I	.	.	.	.	Stop
	A/chicken/Vietnam/TY168/2010	.	.	.	Q	R	I	.	.	.	.	Stop
	*No sequencing data obtained.

## Sheet: PA
Table S2. Comparison of the consensus sequences of the isolated viruses (the sequence of A/duck/Vietnam/ST1488-1/2012 served as the reference sequence)
Clade	Virus Isolate	Amino Acid Position (PA)
		13	20	27	32	44	52	58	61	63	85	97	101	129	141	142	185	204	222	226	231	237	241	261	263	272	285	305	308	315	323	343	344	347	352	357	372	379	387	391	400	401	404	425	466	532	538	541	547
1.1.2	A/duck/Vietnam/ST1488-1/2012	I	A	D	T	V	H	S	I	V	T	T	E	T	E	R	R	K	N	L	A	K	C	L	T	D	M	Y	I	F	V	A	E	D	E	I	E	V	I	R	S	R	A	F	N	L	E	S	D
	A/duck/Vietnam/ST1488-2/2012	.	.	.	.	.	.	.	.	.	.	.	.	.	.	.	.	.	.	.	.	.	.	.	.	.	.	.	.	.	.	.	.	.	.	.	.	.	.	.	.	.	.	.	.	.	.	.	.
	A/duck/Vietnam/ST1488-3/2012	.	.	.	.	.	.	.	.	.	.	.	.	.	.	.	.	.	.	.	.	.	.	.	.	.	.	.	.	.	.	.	.	.	.	.	.	.	.	.	.	.	.	.	.	.	.	.	.
	A/duck/Vietnam/ST1489-1/2012	.	.	.	.	.	.	.	.	.	.	.	.	.	.	.	.	.	.	.	.	.	.	.	.	.	.	.	.	.	.	.	.	.	.	.	.	.	.	.	.	.	.	.	.	.	.	.	.
	A/duck/Vietnam/ST1489-2/2012	.	.	.	.	.	.	.	.	.	.	.	.	.	.	.	.	.	.	.	.	.	.	.	.	.	.	.	.	.	.	.	.	.	.	.	.	.	.	.	.	.	.	.	.	.	.	.	.
	A/duck/Vietnam/ST1489-3/2012	.	.	.	.	.	.	.	.	.	.	.	.	.	.	.	.	.	.	.	.	.	.	.	.	.	.	.	.	.	.	.	.	.	.	.	.	.	.	.	.	.	.	.	.	.	.	.	.
	A/duck/Vietnam/ST1490-1/2012	.	.	.	.	.	.	.	.	.	.	.	.	.	.	.	.	.	.	.	.	.	.	.	.	.	.	.	.	.	.	.	.	.	.	.	.	.	.	.	.	.	.	.	.	.	.	.	.
	A/duck/Vietnam/ST1490-2/2012	.	.	.	.	.	.	.	.	.	.	.	.	.	.	.	.	.	.	.	.	.	.	.	.	.	.	.	.	.	.	.	.	.	.	.	.	.	.	.	.	.	.	.	.	.	.	.	.
	A/duck/Vietnam/ST1490-3/2012	.	.	.	.	.	.	.	.	.	.	.	.	.	.	.	.	.	.	.	.	.	.	.	.	.	.	.	.	.	.	.	.	.	.	.	.	.	.	.	.	.	.	.	.	.	.	.	.
	A/duck/Vietnam/ST1491-1/2012	.	.	.	.	.	.	.	.	.	.	.	.	.	.	.	.	.	.	.	.	.	.	.	.	.	.	.	.	.	.	.	.	.	.	.	.	.	.	.	.	.	.	.	.	.	.	.	.
	A/duck/Vietnam/ST1491-2/2012	.	.	.	.	.	.	.	.	.	.	.	.	.	.	.	.	.	.	.	.	.	.	.	.	.	.	.	.	.	.	.	.	.	.	.	.	.	.	.	.	.	.	.	.	.	.	.	.
	A/duck/Vietnam/ST1491-3/2012	.	.	.	.	.	.	.	.	.	.	.	.	.	.	.	.	.	.	.	.	.	.	.	.	.	.	.	.	.	.	.	.	.	.	.	.	.	.	.	.	.	.	.	.	.	.	.	.
	A/duck/Vietnam/ST1551-3/2012	V	.	.	.	.	.	.	V	.	.	.	.	.	.	.	.	.	.	F	T	.	.	.	.	.	.	.	.	.	.	.	.	.	.	T	.	.	.	.	.	.	.	.	.	.	.	.	.
2.3.2.1a	A/duck/Vietnam/TY165/2010	.	T	S	.	.	.	G	.	A	.	.	D	I	.	.	K	R	.	.	.	E	.	.	.	E	.	.	.	.	.	.	.	.	D	T	.	.	V	K	P	.	S	L	.	.	.	C	.
	A/duck/Vietnam/TY166/2010	.	T	S	.	.	.	G	.	A	.	.	D	I	.	.	K	R	.	.	.	E	.	.	.	E	.	.	.	.	.	.	.	.	D	T	.	.	V	K	P	.	S	L	.	.	.	C	.
	A/duck/Vietnam/LS1352/2011	.	T	S	.	.	.	G	.	A	.	.	D	I	.	.	.	R	.	.	.	E	.	M	.	E	.	.	.	Y	.	S	.	.	D	T	.	.	V	K	P	.	S	L	.	.	G	C	.
	A/duck/Vietnam/LS1353/2011	.	T	S	.	.	.	G	.	A	.	.	D	I	.	.	.	R	.	.	.	E	.	M	.	E	.	.	.	Y	.	S	.	.	D	T	.	.	V	K	P	.	S	L	.	.	G	C	.
	A/duck/Vietnam/LS1354/2011	.	T	S	.	.	.	G	.	A	.	.	D	I	.	.	.	R	.	.	.	E	.	M	.	E	.	.	.	Y	.	S	.	.	D	T	.	.	V	K	P	.	S	L	.	.	G	C	.
	A/duck/Vietnam/TY151/2011	.	T	S	.	.	.	G	.	A	.	.	D	I	.	.	.	R	.	.	.	E	.	M	.	E	.	.	.	Y	.	S	.	.	D	T	.	.	V	K	P	.	S	L	.	.	G	C	.
	A/duck/Vietnam/TY152/2011	.	T	S	.	.	.	G	.	A	.	.	D	I	.	.	.	R	.	.	.	E	.	M	.	E	.	.	.	Y	.	S	.	.	D	T	.	.	V	K	P	.	S	L	.	.	G	C	.
	A/duck/Vietnam/QT1455-1/2012	.	T	S	.	.	.	G	.	A	.	.	D	I	.	.	.	R	.	.	.	E	.	M	.	E	.	.	.	.	I	.	.	.	D	T	.	.	V	K	P	.	S	L	.	.	.	C	N
	A/duck/Vietnam/QT1455-2/2012	.	T	S	.	.	.	G	.	A	.	.	D	I	.	.	.	R	.	.	.	E	.	M	.	E	.	.	.	.	I	.	.	.	D	T	.	.	V	K	P	.	S	L	.	.	.	C	N
	A/duck/Vietnam/QT1455-3/2012	.	T	S	.	.	.	G	.	A	.	.	D	I	.	.	.	R	.	.	.	E	.	M	.	E	.	.	.	.	I	.	.	.	D	T	.	.	V	K	P	.	S	L	.	.	.	C	N
	A/duck/Vietnam/QT1456-1/2012	.	T	S	.	.	.	G	.	A	.	.	D	I	.	.	.	R	.	.	.	E	.	M	.	E	.	.	.	.	I	.	.	.	D	T	.	.	V	K	P	.	S	L	.	.	.	C	N
	A/duck/Vietnam/QT1456-2/2012	.	T	S	.	.	.	G	.	A	.	.	D	I	.	.	.	R	.	.	.	E	.	M	.	E	.	.	.	.	I	.	.	.	D	T	.	.	V	K	P	.	S	L	.	.	.	C	N
	A/duck/Vietnam/QT1456-3/2012	.	T	S	.	.	.	G	.	A	.	.	D	I	.	.	.	R	.	.	.	E	.	M	.	E	.	.	.	.	I	.	.	.	D	T	.	.	V	K	P	.	S	L	.	.	.	C	N
	A/duck/Vietnam/QT1457-1/2012	.	T	S	.	.	.	G	.	A	.	.	D	I	.	.	.	R	.	.	.	E	.	M	.	E	.	.	.	.	I	.	.	.	D	T	.	.	V	K	P	.	S	L	.	.	.	C	N
	A/duck/Vietnam/QT1457-2/2012	.	T	S	.	.	.	G	.	A	.	.	D	I	.	.	.	R	.	.	.	E	.	M	.	E	.	.	.	.	I	.	.	.	D	T	.	.	V	K	P	.	S	L	.	.	.	C	N
	A/duck/Vietnam/QT1457-3/2012	.	T	S	.	.	.	G	.	A	.	.	D	I	.	.	.	R	.	.	.	E	.	M	.	E	.	.	.	.	I	.	.	.	D	T	.	.	V	K	P	.	S	L	.	.	.	C	N
	A/duck/Vietnam/QT1458-1/2012	.	T	S	.	.	.	G	.	A	.	.	D	I	.	.	.	R	.	.	.	E	.	M	.	E	.	.	.	.	I	.	.	.	D	T	.	.	V	K	P	.	S	L	.	.	.	C	N
	A/duck/Vietnam/QT1458-2/2012	.	T	S	.	.	.	G	.	A	.	.	D	I	.	.	.	R	.	.	.	E	.	M	.	E	.	.	.	.	I	.	.	.	D	T	.	.	V	K	P	.	S	L	.	.	.	C	N
	A/duck/Vietnam/QT1458-3/2012	.	T	S	.	.	.	G	.	A	.	.	D	I	.	.	.	R	.	.	.	E	.	M	.	E	.	.	.	.	I	.	.	.	D	T	.	.	V	K	P	.	S	L	.	.	.	C	N
	A/duck/Vietnam/QT1479/2012	.	T	S	.	.	.	G	.	A	.	.	D	I	.	.	.	R	.	.	.	E	.	M	.	E	.	.	.	.	I	.	.	.	D	T	.	.	V	K	P	.	S	L	.	M	.	C	N
	A/duck/Vietnam/QT1480/2012	.	T	S	.	.	.	G	.	A	.	.	D	I	.	.	.	R	.	.	.	E	.	M	.	E	.	.	.	.	I	.	.	.	D	T	.	.	V	K	P	.	S	L	.	M	.	C	N
	A/duck/Vietnam/QT1481/2012	.	T	S	.	.	.	G	.	A	.	.	D	I	.	.	.	R	.	.	.	E	.	M	.	E	.	.	.	.	I	.	.	.	D	T	.	.	V	K	P	.	S	L	.	M	.	C	N
	A/duck/Vietnam/QT1483/2012	.	T	S	.	.	.	G	.	A	.	.	D	I	.	.	.	R	.	.	.	E	.	M	.	E	.	.	.	.	I	.	.	.	D	T	.	.	V	K	P	.	S	L	.	M	.	C	N
	A/duck/Vietnam/QT1484/2012	.	T	S	.	.	.	G	.	A	.	.	D	I	G	.	.	R	.	.	.	E	.	M	.	E	.	.	.	.	.	S	.	.	D	T	.	.	V	K	A	.	S	L	.	.	.	C	.
2.3.2.1b	A/duck/Vietnam/LS1349/2011	.	T	S	.	.	P	G	.	A	.	.	D	I	.	.	.	R	.	.	.	E	.	M	.	E	.	.	.	.	.	.	.	.	D	T	D	I	V	K	P	.	S	L	.	.	V	C	.
2.3.2.1c	A/swallow/Vietnam/NT22/2013	.	T	S	.	.	.	G	.	.	.	.	N	I	.	.	.	R	H	.	.	.	.	M	.	E	.	.	.	.	.	S	.	.	D	T	.	.	V	K	P	.	S	L	.	.	.	C	.
	A/swallow/Vietnam/NT24/2013	.	T	S	.	.	.	G	.	.	.	.	N	I	.	.	.	R	H	.	.	.	.	M	.	E	.	.	.	.	.	S	.	.	D	T	.	.	V	K	P	.	S	L	.	.	.	C	.
	A/swallow/Vietnam/NT25/2013	.	T	S	.	.	.	G	.	.	.	I	N	I	.	.	.	R	H	.	.	.	.	M	.	E	.	.	.	.	.	S	.	N	D	T	.	.	V	K	P	.	S	L	S	.	.	C	.
	A/muscovy duck/Vietnam/BG80-1/2013	.	T	S	.	.	.	G	.	A	.	.	N	I	.	.	.	R	.	.	.	.	.	M	.	.	.	.	.	.	.	S	.	.	D	T	.	.	V	K	P	.	S	L	.	.	.	C	.
	A/muscovy duck/Vietnam/BG80-2/2013	.	T	S	.	.	.	G	.	A	.	.	N	I	.	.	.	R	.	.	.	.	.	M	.	.	.	.	.	.	.	S	.	.	D	T	.	.	V	K	P	.	S	L	.	.	.	C	.
	A/duck/Vietnam/QT1726/2013	.	T	S	.	.	.	G	.	A	.	.	N	I	.	.	.	R	.	.	.	.	.	M	.	E	K	.	V	.	.	S	.	E	D	T	.	.	V	K	P	.	S	L	.	.	.	C	.
	A/duck/Vietnam/QT1727/2013	.	T	S	.	.	.	G	.	A	.	.	N	I	.	.	.	R	.	.	.	.	.	M	.	E	K	.	V	.	.	S	.	E	D	T	.	.	V	K	P	.	S	L	.	.	.	C	.
	A/duck/Vietnam/QT1728/2013	.	T	S	.	.	.	G	.	A	.	.	N	I	.	.	.	R	.	.	.	.	.	M	.	E	K	.	V	.	.	S	.	E	D	T	.	.	V	K	P	.	S	L	.	.	.	C	.
	A/duck/Vietnam/QT1729/2013	.	T	S	.	.	.	G	.	A	.	.	N	I	.	.	.	R	.	.	.	.	.	M	.	E	K	.	V	.	.	S	.	E	D	T	.	.	V	K	P	.	S	L	.	.	.	C	.
	A/duck/Vietnam/QT1730/2013	.	T	S	.	.	.	G	.	A	.	.	N	I	.	.	.	R	.	.	.	.	.	M	.	E	K	.	V	.	.	S	.	E	D	T	.	.	V	K	P	.	S	L	.	.	.	C	.
	A/duck/Vietnam/LS101/2013	.	T	S	.	.	.	G	.	A	.	.	N	I	.	.	.	R	.	.	.	.	.	M	.	.	.	.	.	.	.	S	.	.	D	T	.	.	V	K	P	.	S	L	.	.	.	C	.
	A/muscovy duck/Vietnam/LS154/2013	.	T	S	.	.	.	G	.	A	.	.	N	I	.	.	.	R	.	.	.	.	.	M	.	.	.	.	.	.	.	S	.	.	D	T	.	.	V	K	P	.	S	L	.	.	.	C	.
2.3.4.1	A/chicken/Vietnam/QT517/2009	.	.	.	.	I	.	G	.	.	A	.	D	I	.	K	.	R	.	.	T	E	Y	M	K	.	.	F	.	.	.	.	.	.	.	T	.	.	V	.	P	K	S	L	.	.	.	C	.
	A/chicken/Vietnam/TY167/2010	.	.	.	M	.	.	G	.	.	.	.	D	I	.	K	.	R	.	.	I	E	Y	M	.	.	.	F	.	.	.	.	G	.	G	T	.	.	V	.	P	K	S	L	.	.	.	C	.
	A/chicken/Vietnam/TY168/2010	.	.	.	M	.	.	G	.	.	.	.	D	I	.	K	.	R	.	.	I	E	Y	M	.	.	.	F	.	.	.	.	G	.	G	T	.	.	V	.	P	K	S	L	.	.	.	C	.
[truncated: 11 more columns]

## Sheet: HA
Table S2. Comparison of the consensus sequences of the isolated viruses (the sequence of A/duck/Vietnam/ST1488-1/2012 served as the reference sequence)
Clade	Virus Isolate	Amino Acid Position (HA; amino acid positions are based on the HA sequence of A/Vietnam/1203/2004; H5N1)
		Signal Peptide							2	15	35	41	43	45	48	53	66	71	72	86	94	115	120	123	124	129	133	136	140	141	151	154	155	156	159	162	163	165	167	168	169	174	175	181	183	184	185	186	189
1.1.2	A/duck/Vietnam/ST1488-1/2012	V	L	L	F	I	V	K	Q	K	K	L	D	D	R	R	M	I	K	V	V	Q	S	P	S	M	A	P	Q	S	I	N	S	T	T	R	S	N	T	N	Q	V	M	P	D	A	A	T	K
	A/duck/Vietnam/ST1488-2/2012	.	.	.	.	.	.	.	.	.	.	.	.	.	.	.	.	.	N	.	.	.	.	.	.	.	.	.	.	.	.	.	.	.	.	.	.	.	.	.	.	.	.	.	.	.	.	.	.
	A/duck/Vietnam/ST1488-3/2012	.	.	.	.	.	.	.	.	.	.	.	.	.	.	.	.	.	N	.	.	.	.	.	.	.	.	.	.	.	.	.	.	.	.	.	.	.	.	.	.	.	.	.	.	.	.	.	.
	A/duck/Vietnam/ST1489-1/2012	.	.	.	.	.	.	.	.	.	.	.	.	.	.	.	.	.	N	.	.	.	.	.	.	.	.	.	.	.	.	.	.	.	.	.	.	.	.	.	.	.	.	.	.	.	.	.	.
	A/duck/Vietnam/ST1489-2/2012	.	.	.	.	.	.	.	.	.	.	.	.	.	.	.	.	.	N	.	.	.	.	.	.	.	.	.	.	.	.	.	.	.	.	.	.	.	.	.	.	.	.	.	.	.	.	.	.
	A/duck/Vietnam/ST1489-3/2012	.	.	.	.	.	.	.	.	.	.	.	.	.	.	.	.	.	N	.	.	.	.	.	.	.	.	.	.	.	.	.	.	.	.	.	.	.	.	.	.	.	.	.	.	.	.	.	.
	A/duck/Vietnam/ST1490-1/2012	.	.	.	.	.	.	.	.	.	.	.	.	.	.	.	.	.	N	.	.	.	.	.	.	.	.	.	.	.	.	.	.	.	.	.	.	.	.	.	.	.	.	.	.	.	.	.	.
	A/duck/Vietnam/ST1490-2/2012	.	.	.	.	.	.	.	.	.	.	.	.	.	.	.	.	.	N	.	.	.	.	.	.	.	.	.	.	.	.	.	.	.	.	.	.	.	.	.	.	.	.	.	.	.	.	.	.
	A/duck/Vietnam/ST1490-3/2012	.	.	.	.	.	.	.	.	.	.	.	.	.	.	.	.	.	N	.	.	.	.	.	.	.	.	.	.	.	.	.	.	.	.	.	.	.	.	.	.	.	.	.	.	.	.	.	.
	A/duck/Vietnam/ST1491-1/2012	.	.	.	.	.	.	.	.	.	.	.	.	.	.	.	.	.	N	.	.	.	.	.	.	.	.	.	.	.	.	.	.	.	.	.	.	.	.	.	.	.	.	.	.	.	.	.	.
	A/duck/Vietnam/ST1491-2/2012	.	.	.	.	.	.	.	.	.	.	.	.	.	.	.	.	.	N	.	.	.	.	.	.	.	.	.	.	.	.	.	.	.	.	.	.	.	.	.	.	.	.	.	.	.	.	.	.
	A/duck/Vietnam/ST1491-3/2012	.	.	.	.	.	.	.	.	.	.	.	.	.	.	.	.	.	N	.	.	.	.	.	.	.	.	.	.	.	.	.	.	.	.	.	.	.	.	.	.	.	.	.	.	.	.	.	.
	A/duck/Vietnam/ST1551-3/2012	.	.	.	.	.	.	.	.	Q	.	.	.	.	.	.	.	.	N	.	.	.	.	.	.	L	.	.	.	.	.	.	.	.	.	.	.	.	.	.	.	.	.	.	N	.	.	.	.
2.3.2.1a	A/duck/Vietnam/TY165/2010	.	.	.	.	T	I	.	H	Q	.	.	.	N	K	K	.	.	N	A	N	.	D	S	N	L	.	.	N	.	.	D	N	A	.	K	G	.	.	.	.	.	L	.	.	E	.	.	R
	A/duck/Vietnam/TY166/2010	.	.	.	.	T	I	.	H	Q	.	.	.	N	K	K	.	.	N	A	N	.	D	S	N	L	.	.	N	.	.	D	N	A	.	K	G	.	.	.	.	.	L	.	.	E	.	.	R
	A/duck/Vietnam/LS1352/2011	.	.	.	.	T	I	.	H	Q	.	.	.	N	K	K	.	.	N	A	N	.	D	S	D	L	.	.	N	.	.	D	N	A	.	K	G	.	.	.	.	.	L	.	.	E	.	I	.
	A/duck/Vietnam/LS1353/2011	.	.	.	.	T	I	.	H	Q	.	.	.	N	K	K	.	.	N	A	N	.	D	S	D	L	.	.	N	.	.	D	N	A	.	K	G	.	.	.	.	.	L	.	.	E	.	I	.
	A/duck/Vietnam/LS1354/2011	.	.	.	.	T	I	.	H	Q	.	.	.	N	K	K	.	.	N	A	N	.	D	S	D	L	.	.	N	.	.	D	N	A	.	K	G	.	.	.	.	.	L	.	.	E	.	I	.
	A/duck/Vietnam/TY151/2011	.	.	.	.	T	I	.	H	Q	.	.	.	N	K	K	.	.	N	A	N	.	D	S	D	L	.	.	N	.	.	D	N	A	.	K	G	.	.	.	.	.	L	.	.	E	.	I	.
	A/duck/Vietnam/TY152/2011	.	.	.	.	T	I	.	H	Q	.	.	.	N	K	K	.	.	N	A	N	.	D	S	D	L	.	.	N	.	.	D	N	A	.	K	G	.	.	.	.	.	L	.	.	E	.	I	.
	A/duck/Vietnam/QT1455-1/2012	.	.	.	.	T	I	.	H	Q	.	.	.	N	K	K	.	.	N	A	N	.	D	T	D	L	.	.	N	.	.	D	N	A	.	K	G	.	.	.	.	.	L	.	N	E	.	.	R
	A/duck/Vietnam/QT1455-2/2012	.	.	.	.	T	I	.	H	Q	.	.	.	N	K	K	.	.	N	A	N	.	D	T	D	L	.	.	N	.	.	D	N	A	.	K	G	.	.	.	.	.	L	.	N	E	.	.	R
	A/duck/Vietnam/QT1455-3/2012	.	.	.	.	T	I	.	H	Q	.	.	.	N	K	K	.	.	N	A	N	.	D	T	D	L	.	.	N	.	.	D	N	A	.	K	G	.	.	.	.	.	L	.	N	E	.	.	R
	A/duck/Vietnam/QT1456-1/2012	.	.	.	.	T	I	.	H	Q	.	.	.	N	K	K	.	.	N	A	N	.	D	T	D	L	.	.	N	.	.	D	N	A	.	K	G	.	.	.	.	.	L	.	N	E	.	.	R
	A/duck/Vietnam/QT1456-2/2012	.	.	.	.	T	I	.	H	Q	.	.	.	N	K	K	.	.	N	A	N	.	D	T	D	L	.	.	N	.	.	D	N	A	.	K	G	.	.	.	.	.	L	.	N	E	.	.	R
	A/duck/Vietnam/QT1456-3/2012	.	.	.	.	T	I	.	H	Q	.	.	.	N	K	K	.	.	N	A	N	.	D	T	D	L	.	.	N	.	.	D	N	A	.	K	G	.	.	.	.	.	L	.	N	E	.	.	R
	A/duck/Vietnam/QT1457-1/2012	.	.	.	.	T	I	.	H	Q	.	.	.	N	K	K	.	.	N	A	N	.	D	T	D	L	.	.	N	.	.	D	N	A	.	K	G	.	.	.	.	.	L	.	N	E	.	.	R
	A/duck/Vietnam/QT1457-2/2012	.	.	.	.	T	I	.	H	Q	.	.	.	N	K	K	.	.	N	A	N	.	D	T	D	L	.	.	N	.	.	D	N	A	.	K	G	.	.	.	.	.	L	.	N	E	.	.	R
	A/duck/Vietnam/QT1457-3/2012	.	.	.	.	T	I	.	H	Q	.	.	.	N	K	K	.	.	N	A	N	.	D	T	D	L	.	.	N	.	.	D	N	A	.	K	G	.	.	.	.	.	L	.	N	E	.	.	R
	A/duck/Vietnam/QT1458-1/2012	.	.	.	.	T	I	.	H	Q	.	.	.	N	K	K	.	.	N	A	N	.	D	T	D	L	.	.	N	.	.	D	N	A	.	K	G	.	.	.	.	.	L	.	N	E	.	.	R
	A/duck/Vietnam/QT1458-2/2012	.	.	.	.	T	I	.	H	Q	.	.	.	N	K	K	.	.	N	A	N	.	D	T	D	L	.	.	N	.	.	D	N	A	.	K	G	.	.	.	.	.	L	.	N	E	.	.	R
	A/duck/Vietnam/QT1458-3/2012	.	.	.	.	T	I	.	H	Q	.	.	.	N	K	K	.	.	N	A	N	.	D	T	D	L	.	.	N	.	.	D	N	A	.	K	G	.	.	.	.	.	L	.	N	E	.	.	R
	A/duck/Vietnam/QT1479/2012	.	.	.	.	T	I	.	H	Q	.	.	.	N	K	K	.	.	N	A	N	.	D	T	D	L	.	.	N	.	.	D	N	A	.	K	G	.	.	.	.	.	L	.	.	E	.	.	R
	A/duck/Vietnam/QT1480/2012	.	.	.	.	T	I	.	H	Q	.	.	.	N	K	K	.	.	N	A	N	.	D	T	D	L	.	.	N	.	.	D	N	A	.	K	G	.	.	.	.	.	L	.	.	E	.	.	R
	A/duck/Vietnam/QT1481/2012	.	.	.	.	T	I	.	H	Q	.	.	.	N	K	K	.	.	N	A	N	.	D	T	D	L	.	.	N	.	.	D	N	A	.	K	G	.	.	.	.	.	L	.	.	E	.	.	R
	A/duck/Vietnam/QT1483/2012	.	.	.	.	T	I	.	H	Q	.	.	.	N	K	K	.	.	N	A	N	.	D	T	D	L	.	.	N	.	.	D	N	A	.	K	G	.	.	.	.	.	L	.	.	E	.	.	R
	A/duck/Vietnam/QT1484/2012	.	.	.	.	T	I	.	H	Q	.	.	.	N	K	K	.	.	N	A	N	.	D	S	D	L	.	.	N	.	.	D	N	A	.	K	G	S	.	.	.	.	L	.	.	E	.	.	.
2.3.2.1b	A/duck/Vietnam/LS1349/2011	.	.	.	.	.	.	.	H	Q	.	.	.	N	K	K	.	.	D	A	N	R	N	.	E	L	.	S	N	.	L	D	D	A	I	K	.	K	I	.	K	.	L	.	.	E	.	I	R
2.3.2.1c	A/swallow/Vietnam/NT22/2013	.	.	.	.	T	I	.	H	Q	.	.	.	N	K	K	L	T	N	A	N	.	D	.	D	L	.	S	N	.	.	D	N	A	.	K	G	.	.	.	R	I	L	.	.	E	.	.	R
	A/swallow/Vietnam/NT24/2013	.	.	.	.	T	I	.	H	Q	.	.	N	N	K	K	L	T	N	A	N	.	D	.	D	L	.	S	N	.	.	D	N	A	.	K	G	.	.	.	R	I	L	.	.	E	.	.	R
	A/swallow/Vietnam/NT25/2013	.	.	.	.	T	I	.	H	Q	.	I	.	N	K	K	L	T	N	A	N	.	D	.	D	L	.	S	N	.	.	D	N	A	.	K	G	.	.	.	R	I	L	.	.	E	.	.	R
	A/muscovy duck/Vietnam/BG80-1/2013	.	.	.	.	T	I	.	H	Q	R	.	.	N	K	K	L	T	N	A	N	.	D	S	D	L	.	S	N	.	.	D	N	A	.	K	G	.	.	.	R	I	L	.	.	E	.	.	R
	A/muscovy duck/Vietnam/BG80-2/2013	.	.	.	.	T	I	.	H	Q	R	.	.	N	K	K	L	T	N	A	N	.	D	S	D	L	.	S	N	.	.	D	N	A	.	K	G	.	.	.	R	I	L	.	.	E	.	.	R
	A/duck/Vietnam/QT1726/2013	I	.	.	.	T	I	.	H	Q	.	.	.	N	K	K	L	T	N	A	N	.	D	S	D	L	.	S	N	.	.	D	N	A	.	K	G	.	.	.	R	I	L	.	.	E	.	.	R
	A/duck/Vietnam/QT1727/2013	I	.	.	.	T	I	.	H	Q	.	.	.	N	K	K	L	T	N	A	N	.	D	S	D	L	.	S	N	.	.	D	N	A	.	K	G	.	.	.	R	I	L	.	.	E	.	.	R
	A/duck/Vietnam/QT1728/2013	I	.	.	.	T	I	.	H	Q	.	.	.	N	K	K	L	T	N	A	N	.	D	S	D	L	.	S	N	.	.	D	N	A	.	K	G	.	.	.	R	I	L	.	.	E	.	.	R
	A/duck/Vietnam/QT1729/2013	I	.	.	.	T	I	.	H	Q	.	.	.	N	K	K	L	T	N	A	N	.	D	S	D	L	.	S	N	.	.	D	N	A	.	K	G	.	.	.	R	I	L	.	.	E	.	.	R
	A/duck/Vietnam/QT1730/2013	I	.	.	.	T	I	.	H	Q	.	.	.	N	K	K	L	T	N	A	N	.	D	S	D	L	.	S	N	.	.	D	N	A	.	K	G	.	.	.	R	I	L	.	.	E	.	.	R
	A/duck/Vietnam/LS101/2013	.	.	.	.	T	I	.	H	Q	.	.	.	N	K	K	L	T	N	A	N	.	D	S	D	L	.	S	K	.	.	D	N	A	.	K	G	.	.	.	R	I	L	.	.	E	.	.	R
	A/muscovy duck/Vietnam/LS154/2013	.	.	.	.	T	I	.	H	Q	.	.	.	N	K	K	L	T	N	A	N	.	D	S	D	L	.	S	N	.	.	D	N	A	.	K	G	.	.	.	R	I	L	.	.	E	.	.	R
2.3.4.1	A/chicken/Vietnam/QT517/2009	.	F	.	L	.	.	R	.	Q	.	.	.	.	K	.	.	.	N	A	N	.	.	S	D	S	S	.	T	P	.	.	N	.	.	.	.	.	.	S	.	.	L	S	.	.	T	M	.
	A/chicken/Vietnam/TY167/2010	.	.	F	L	.	.	R	.	Q	.	.	.	.	K	.	.	.	N	.	N	R	.	.	D	S	S	.	T	P	.	.	N	.	.	.	.	.	.	S	.	.	L	S	.	.	T	I	.
	A/chicken/Vietnam/TY168/2010	.	.	F	L	.	.	R	.	Q	.	.	.	.	K	.	.	.	N	.	N	R	.	.	D	S	S	.	T	P	.	.	N	.	.	.	.	.	.	S	.	.	L	S	.	.	T	I	.
[truncated: 32 more columns]

## Sheet: NP
Table S2. Comparison of the consensus sequences of the isolated viruses (the sequence of A/duck/Vietnam/ST1488-1/2012 served as the reference sequence)
Clade	Virus Isolate	Amino Acid Position (NP)
		16	52	77	105	186	201	239	287	350	353	371	373	391	398	408	426	430	446	452	453	454	466
1.1.2	A/duck/Vietnam/ST1488-1/2012	S	Y	R	M	I	V	M	S	T	V	M	A	R	H	V	M	T	R	R	P	E	L
	A/duck/Vietnam/ST1488-2/2012	.	.	.	.	.	.	.	.	.	.	.	.	.	.	.	.	.	.	.	.	.	.
	A/duck/Vietnam/ST1488-3/2012	.	.	.	.	.	.	.	.	.	.	.	.	.	.	.	.	.	.	.	.	.	.
	A/duck/Vietnam/ST1489-1/2012	.	.	.	.	.	.	.	G	.	.	.	.	.	.	.	.	.	.	.	.	.	.
	A/duck/Vietnam/ST1489-2/2012	.	.	.	.	.	.	.	G	.	.	.	.	.	.	.	.	.	.	.	.	.	.
	A/duck/Vietnam/ST1489-3/2012	.	.	.	.	.	.	.	G	.	.	.	.	.	.	.	.	.	.	.	.	.	.
	A/duck/Vietnam/ST1490-1/2012	.	.	.	.	.	.	.	.	.	.	.	.	.	.	.	.	.	.	.	.	.	.
	A/duck/Vietnam/ST1490-2/2012	.	.	.	.	.	.	.	.	.	.	.	.	.	.	.	.	.	.	.	.	.	.
	A/duck/Vietnam/ST1490-3/2012	.	.	.	.	.	.	.	.	.	.	.	.	.	.	.	.	.	.	.	.	.	.
	A/duck/Vietnam/ST1491-1/2012	.	.	.	.	.	.	.	.	.	.	.	.	.	.	.	.	.	.	.	.	.	.
	A/duck/Vietnam/ST1491-2/2012	.	.	.	.	.	.	.	.	.	.	.	.	.	.	.	.	.	.	.	.	.	.
	A/duck/Vietnam/ST1491-3/2012	.	.	.	.	.	.	.	.	.	.	.	.	.	.	.	.	.	.	.	.	.	.
	A/duck/Vietnam/ST1551-3/2012	.	.	.	V	.	I	.	.	.	.	.	.	.	.	.	.	.	.	.	.	.	.
2.3.2.1a	A/duck/Vietnam/TY165/2010	G	.	.	V	V	I	.	.	.	.	.	.	.	Q	.	.	.	.	.	.	.	.
	A/duck/Vietnam/TY166/2010	G	.	.	V	V	I	.	.	.	.	.	.	.	Q	.	.	.	.	.	.	.	.
	A/duck/Vietnam/LS1352/2011	G	.	.	V	.	I	.	.	.	.	.	.	.	Q	.	.	.	.	.	.	.	.
	A/duck/Vietnam/LS1353/2011	G	.	.	V	.	I	.	.	.	.	.	.	.	Q	.	.	.	.	.	.	.	.
	A/duck/Vietnam/LS1354/2011	G	.	.	V	.	I	.	.	.	.	.	.	.	Q	.	.	.	.	.	.	.	.
	A/duck/Vietnam/TY151/2011	G	.	.	V	.	I	.	.	.	.	.	.	.	Q	.	.	.	.	.	.	.	.
	A/duck/Vietnam/TY152/2011	G	.	.	V	.	I	.	.	.	.	.	.	.	Q	.	.	.	.	.	.	.	.
	A/duck/Vietnam/QT1455-1/2012	G	.	K	V	V	I	.	.	.	.	.	.	.	Q	.	.	.	.	.	.	.	.
	A/duck/Vietnam/QT1455-2/2012	G	.	K	V	V	I	.	.	.	.	.	.	.	Q	.	.	.	.	.	.	.	.
	A/duck/Vietnam/QT1455-3/2012	G	.	K	V	V	I	.	.	.	.	.	.	.	Q	.	.	.	.	.	.	.	.
	A/duck/Vietnam/QT1456-1/2012	G	.	K	V	V	I	.	.	.	.	.	.	.	Q	.	.	.	.	.	.	.	.
	A/duck/Vietnam/QT1456-2/2012	G	.	K	V	V	I	.	.	.	.	.	.	.	Q	.	.	.	.	.	.	.	.
	A/duck/Vietnam/QT1456-3/2012	G	.	K	V	V	I	.	.	.	.	.	.	.	Q	.	.	.	.	.	.	.	.
	A/duck/Vietnam/QT1457-1/2012	G	.	K	V	V	I	.	.	.	.	.	.	.	Q	.	.	.	.	.	.	.	.
	A/duck/Vietnam/QT1457-2/2012	G	.	K	V	V	I	.	.	.	.	.	.	.	Q	.	.	.	.	.	.	.	.
	A/duck/Vietnam/QT1457-3/2012	G	.	K	V	V	I	.	.	.	.	.	.	.	Q	.	.	.	.	.	.	.	.
	A/duck/Vietnam/QT1458-1/2012	G	.	K	V	V	I	.	.	.	.	.	.	.	Q	.	.	.	.	.	.	.	.
	A/duck/Vietnam/QT1458-2/2012	G	.	K	V	V	I	.	.	.	.	.	.	.	Q	.	.	.	.	.	.	.	.
	A/duck/Vietnam/QT1458-3/2012	G	.	K	V	V	I	.	.	.	.	.	.	.	Q	.	.	.	.	.	.	.	.
	A/duck/Vietnam/QT1479/2012	G	.	K	V	V	I	.	.	.	.	.	.	.	Q	.	.	.	.	.	.	.	.
	A/duck/Vietnam/QT1480/2012	G	.	K	A	V	I	.	.	.	.	.	.	.	Q	.	.	.	.	.	.	.	.
	A/duck/Vietnam/QT1481/2012	G	.	K	A	V	I	.	.	.	.	.	.	.	Q	.	.	.	.	.	.	.	.
	A/duck/Vietnam/QT1483/2012	G	.	K	V	V	I	.	.	.	.	.	.	.	Q	.	.	.	.	.	.	.	.
	A/duck/Vietnam/QT1484/2012	G	.	.	V	V	I	.	.	.	A	.	.	.	Q	.	.	.	.	.	.	.	.
2.3.2.1b	A/duck/Vietnam/LS1349/2011	G	H	.	V	V	I	.	.	.	.	.	T	.	.	.	.	.	.	K	.	.	.
2.3.2.1c	A/swallow/Vietnam/NT22/2013	G	H	.	V	V	I	.	.	A	.	.	T	.	Q	.	.	.	.	K	.	.	.
	A/swallow/Vietnam/NT24/2013	G	H	.	V	V	I	.	.	A	.	.	T	.	Q	.	.	.	.	K	.	.	.
	A/swallow/Vietnam/NT25/2013	G	H	.	V	V	I	.	.	A	.	.	T	.	Q	.	.	.	.	K	.	.	.
	A/muscovy duck/Vietnam/BG80-1/2013	G	H	.	V	V	I	.	.	A	.	.	T	.	Q	.	.	I	.	K	.	.	.
	A/muscovy duck/Vietnam/BG80-2/2013	G	H	.	V	V	I	.	.	A	.	.	T	.	Q	.	.	I	.	K	.	.	.
	A/duck/Vietnam/QT1726/2013	G	H	.	V	V	I	.	.	A	.	T	T	.	Q	I	L	.	.	K	.	.	.
	A/duck/Vietnam/QT1727/2013	G	H	.	V	V	I	.	.	A	.	.	T	.	Q	I	L	.	.	K	.	.	.
	A/duck/Vietnam/QT1728/2013	G	H	.	V	V	I	.	.	A	.	.	T	.	Q	I	L	.	.	K	.	.	.
	A/duck/Vietnam/QT1729/2013	G	H	.	V	V	I	.	.	A	.	.	T	.	Q	I	L	.	.	K	.	.	.
	A/duck/Vietnam/QT1730/2013	G	H	.	V	V	I	.	.	A	.	.	T	.	Q	I	L	.	.	K	.	.	.
	A/duck/Vietnam/LS101/2013	G	H	.	V	V	I	.	.	A	.	.	T	.	Q	.	.	I	.	K	.	.	.
	A/muscovy duck/Vietnam/LS154/2013	G	H	.	V	V	I	.	.	A	.	.	T	.	Q	.	.	.	.	K	A	.	.
2.3.4.1	A/chicken/Vietnam/QT517/2009	G	.	.	V	V	I	.	.	.	I	.	T	K	Q	.	.	A	K	.	.	G	F
	A/chicken/Vietnam/TY167/2010	.	.	.	V	V	I	V	.	.	.	.	T	.	Q	.	.	A	K	.	.	.	F
	A/chicken/Vietnam/TY168/2010	.	.	.	V	V	I	V	.	.	.	.	T	.	Q	.	.	A	K	.	.	.	F

## Sheet: NA
Table S2. Comparison of the consensus sequences of the isolated viruses (the sequence of A/duck/Vietnam/ST1488-1/2012 served as the reference sequence)
Clade	Virus Isolate	Amino Acid Position [NA; upper row: numbering for NA possessing a 20-amino acid deletion (Δ49-68); lower row: full-length NA]
		8	17	20	23	26	29	32	35	39	41	46	50	51	55	57	58	59	61	62	63	64	66	69	73	75	79	85	106	129	142	143	168	172	202	212	217	220	233	238	244	245	250	266	269	284	289	293	312
		8	17	20	23	26	29	32	35	39	41	46	70	71	75	77	78	79	81	82	83	84	86	89	93	95	99	105	126	149	162	163	188	192	222	232	237	240	253	258	264	265	270	286	289	304	309	313	332
1.1.2	A/duck/Vietnam/ST1488-1/2012	I	T	V	M	V	M	I	N	H	G	A	S	N	P	E	K	A	V	S	A	K	A	S	P	N	V	S	H	A	P	V	T	T	N	A	Y	T	H	M	I	K	D	G	T	I	N	Q	K
	A/duck/Vietnam/ST1488-2/2012	.	.	.	.	.	.	.	.	.	.	.	.	.	.	.	.	.	.	.	.	.	.	.	.	.	.	.	.	.	.	.	.	.	.	.	.	.	.	.	.	.	.	.	.	.	.	.	.
	A/duck/Vietnam/ST1488-3/2012	.	.	.	.	.	.	.	.	.	.	.	.	.	.	.	.	.	.	.	.	.	.	.	.	.	.	.	.	.	.	.	.	.	.	.	.	.	.	.	.	.	.	.	.	.	.	.	.
	A/duck/Vietnam/ST1489-1/2012	.	.	.	.	.	.	.	.	.	.	.	.	.	.	.	.	.	.	.	.	.	.	.	.	.	.	.	.	.	.	.	.	.	.	.	.	.	.	.	.	.	.	.	.	.	.	.	.
	A/duck/Vietnam/ST1489-2/2012	.	.	.	.	.	.	.	.	.	.	.	.	.	.	.	.	.	.	.	.	.	.	.	.	.	.	.	.	.	.	.	.	.	.	.	.	.	.	.	.	.	.	.	.	.	.	.	.
	A/duck/Vietnam/ST1489-3/2012	.	.	.	.	.	.	.	.	.	.	.	.	.	.	.	.	.	.	.	.	.	.	.	.	.	.	.	.	.	.	.	.	.	.	.	.	.	.	.	.	.	.	.	.	.	.	.	.
	A/duck/Vietnam/ST1490-1/2012	.	.	.	.	.	.	.	.	.	.	.	.	.	.	.	.	.	.	.	.	.	.	.	.	.	.	.	.	.	.	.	.	.	.	.	.	.	.	.	.	.	.	.	.	.	.	.	.
	A/duck/Vietnam/ST1490-2/2012	.	.	.	.	.	.	.	.	.	.	.	.	.	.	.	.	.	.	.	.	.	.	.	.	.	.	.	.	.	.	.	.	.	.	.	.	.	.	.	.	.	.	.	.	.	.	.	.
	A/duck/Vietnam/ST1490-3/2012	.	.	.	.	.	.	.	.	.	.	.	.	.	.	.	.	.	.	.	.	.	.	.	.	.	.	.	.	.	.	.	.	.	.	.	.	.	.	.	.	.	.	.	.	.	.	.	.
	A/duck/Vietnam/ST1491-1/2012	.	.	.	.	.	.	.	.	.	.	.	.	.	.	.	.	.	.	.	.	.	.	.	.	.	.	.	.	.	.	.	.	.	.	.	.	.	.	.	.	.	.	.	.	.	.	.	.
	A/duck/Vietnam/ST1491-2/2012	.	.	.	.	.	.	.	.	.	.	.	.	.	.	.	.	.	.	.	.	.	.	.	.	.	.	.	.	.	.	.	.	.	.	.	.	.	.	.	.	.	.	.	.	.	.	.	.
	A/duck/Vietnam/ST1491-3/2012	.	.	.	.	.	.	.	.	.	.	.	.	.	.	.	.	.	.	.	.	.	.	.	.	.	.	.	.	.	.	.	.	.	.	.	.	.	.	.	.	.	.	.	.	.	.	.	.
	A/duck/Vietnam/ST1551-3/2012	.	.	.	.	.	.	.	.	R	.	.	.	.	.	.	.	.	.	.	.	.	T	.	.	.	.	.	.	.	.	.	.	.	.	.	.	.	.	.	.	.	.	.	.	.	.	.	.
2.3.2.1a	A/duck/Vietnam/TY165/2010	V	I	.	.	I	.	.	S	Q	.	T	R	.	L	.	N	.	A	.	V	T	.	.	.	R	.	.	.	V	.	I	.	.	D	.	S	.	Y	I	V	.	N	.	I	V	D	.	.
	A/duck/Vietnam/TY166/2010	V	I	.	.	I	.	.	S	Q	.	T	R	.	L	.	N	.	A	.	V	T	.	.	.	R	.	.	.	V	.	I	.	.	D	.	S	.	Y	I	V	.	N	.	I	V	.	.	.
	A/duck/Vietnam/LS1352/2011	V	I	.	.	I	.	.	S	Q	.	T	R	.	L	.	N	.	A	.	V	T	.	.	.	R	.	.	.	V	.	I	.	.	S	.	S	.	Y	I	V	.	N	.	I	V	.	.	.
	A/duck/Vietnam/LS1353/2011	V	I	.	.	I	.	.	S	Q	.	T	R	.	L	.	N	.	A	.	V	T	.	.	.	R	.	.	.	V	.	I	.	.	S	.	S	.	Y	I	V	.	N	.	I	V	.	.	.
	A/duck/Vietnam/LS1354/2011	V	I	.	.	I	.	.	S	Q	.	T	R	.	L	.	N	.	A	.	V	T	.	.	.	R	.	.	.	V	.	I	.	.	S	.	S	.	Y	I	V	.	N	.	I	V	.	.	.
	A/duck/Vietnam/TY151/2011	V	I	.	.	I	.	.	S	Q	.	T	R	.	L	.	N	.	A	.	V	T	.	.	.	R	.	.	.	V	.	I	.	.	S	.	S	.	Y	I	V	.	N	.	I	V	.	.	.
	A/duck/Vietnam/TY152/2011	V	I	.	.	I	.	.	S	Q	.	T	R	.	L	.	N	.	A	.	V	T	.	.	.	R	.	.	.	V	.	I	.	.	S	.	S	.	Y	I	V	.	N	.	I	V	.	.	.
	A/duck/Vietnam/QT1455-1/2012	V	I	.	.	I	.	.	S	Q	.	T	R	.	L	.	N	.	A	.	V	A	S	.	.	R	.	.	N	V	.	I	I	.	.	T	S	.	Y	I	V	.	N	.	I	V	.	.	E
	A/duck/Vietnam/QT1455-2/2012	V	I	.	.	I	.	.	S	Q	.	T	R	.	L	.	N	.	A	.	V	A	S	.	.	R	.	.	N	V	.	I	I	.	.	T	S	.	Y	I	V	.	N	.	I	V	.	.	E
	A/duck/Vietnam/QT1455-3/2012	V	I	.	.	I	.	.	S	Q	.	T	R	.	L	.	N	.	A	.	V	A	S	.	.	R	.	.	N	V	.	I	I	.	.	T	S	.	Y	I	V	.	N	.	I	V	.	.	E
	A/duck/Vietnam/QT1456-1/2012	V	I	.	.	I	.	.	S	Q	.	T	R	.	L	.	N	.	A	.	V	A	S	.	.	R	.	.	N	V	.	I	I	.	.	T	S	.	Y	I	V	.	N	.	I	V	.	.	E
	A/duck/Vietnam/QT1456-2/2012	V	I	.	.	I	.	.	S	Q	.	T	R	.	L	.	N	.	A	.	V	A	S	.	.	R	.	.	N	V	.	I	I	.	.	T	S	.	Y	I	V	.	N	.	I	V	.	.	E
	A/duck/Vietnam/QT1456-3/2012	V	I	.	.	I	.	.	S	Q	.	T	R	.	L	.	N	.	A	.	V	A	S	.	.	R	.	.	N	V	.	I	I	.	.	T	S	.	Y	I	V	.	N	.	I	V	.	.	E
	A/duck/Vietnam/QT1457-1/2012	V	I	.	.	I	.	.	S	Q	.	T	R	.	L	.	N	.	A	.	V	A	S	.	.	R	.	.	N	V	.	I	I	.	.	T	S	.	Y	I	V	.	N	.	I	V	.	.	E
	A/duck/Vietnam/QT1457-2/2012	V	I	.	.	I	.	.	S	Q	.	T	R	.	L	.	N	.	A	.	V	A	S	.	.	R	.	.	N	V	.	I	I	.	.	T	S	.	Y	I	V	.	N	.	I	V	.	.	E
	A/duck/Vietnam/QT1457-3/2012	V	I	.	.	I	.	.	S	Q	.	T	R	.	L	.	N	.	A	.	V	A	S	.	.	R	.	.	N	V	.	I	I	.	.	T	S	.	Y	I	V	.	N	.	I	V	.	.	E
	A/duck/Vietnam/QT1458-1/2012	V	I	.	.	I	.	.	S	Q	.	T	R	.	L	.	N	.	A	.	V	A	S	.	.	R	.	.	N	V	.	I	I	.	.	T	S	.	Y	I	V	.	N	.	I	V	.	.	E
	A/duck/Vietnam/QT1458-2/2012	V	I	.	.	I	.	.	S	Q	.	T	R	.	L	.	N	.	A	.	V	A	S	.	.	R	.	.	N	V	.	I	I	.	.	T	S	.	Y	I	V	.	N	.	I	V	.	.	E
	A/duck/Vietnam/QT1458-3/2012	V	I	.	.	I	.	.	S	Q	.	T	R	.	L	.	N	.	A	.	V	A	S	.	.	R	.	.	N	V	.	I	I	.	.	T	S	.	Y	I	V	.	N	.	I	V	.	.	E
	A/duck/Vietnam/QT1479/2012	V	I	.	.	I	.	.	S	Q	.	T	R	.	L	.	N	.	A	.	V	A	S	.	.	R	A	.	N	V	.	I	I	.	.	T	S	.	Y	I	V	.	N	.	I	V	.	.	E
	A/duck/Vietnam/QT1480/2012	V	I	.	.	I	.	.	S	Q	.	T	R	.	L	.	N	.	A	.	V	A	S	.	.	R	A	.	N	V	.	I	I	.	.	T	S	.	Y	I	V	.	N	.	I	V	.	.	E
	A/duck/Vietnam/QT1481/2012	V	I	.	.	I	.	.	S	Q	.	T	R	.	L	.	N	.	A	.	V	A	S	.	.	R	A	.	N	V	.	I	I	.	.	T	S	.	Y	I	V	N	N	.	I	V	.	.	E
	A/duck/Vietnam/QT1483/2012	V	I	.	.	I	.	.	S	Q	.	T	R	.	L	.	N	.	A	.	V	A	S	.	.	R	A	.	N	V	.	I	I	.	.	T	S	.	Y	I	V	.	N	.	I	V	.	.	E
	A/duck/Vietnam/QT1484/2012	V	I	.	.	I	.	.	S	Q	.	T	R	.	L	.	.	.	A	.	V	T	.	.	.	R	.	.	.	V	.	I	.	.	.	.	S	.	Y	I	V	.	N	.	I	V	.	.	.
2.3.2.1b	A/duck/Vietnam/LS1349/2011	V	I	I	.	I	I	.	S	Q	.	T	R	.	L	.	N	.	A	.	V	T	.	.	S	R	.	.	.	V	S	I	.	I	.	.	S	.	Y	I	V	.	N	.	I	V	.	.	T
2.3.2.1c	A/swallow/Vietnam/NT22/2013	V	I	I	.	I	I	.	S	Q	.	T	R	S	L	.	N	.	A	.	V	T	.	.	.	K	.	.	.	V	.	T	.	I	.	.	S	A	Y	I	V	.	N	.	I	V	.	R	T
	A/swallow/Vietnam/NT24/2013	V	I	I	.	I	I	.	S	Q	.	T	R	S	L	.	N	.	A	.	V	T	.	.	.	K	.	.	.	V	.	T	.	I	.	.	S	A	Y	I	V	.	N	.	I	V	.	R	T
	A/swallow/Vietnam/NT25/2013	V	I	I	.	I	I	.	S	Q	.	T	R	S	L	.	N	.	A	.	V	T	.	.	.	K	.	.	.	V	.	T	.	I	.	.	S	A	Y	I	V	.	N	.	I	V	.	R	T
	A/muscovy duck/Vietnam/BG80-1/2013	V	I	I	.	I	I	.	S	Q	.	T	R	.	L	.	N	.	A	L	V	T	.	.	.	K	.	.	.	V	.	I	.	I	.	.	S	A	Y	I	V	.	N	.	M	V	.	.	T
	A/muscovy duck/Vietnam/BG80-2/2013	V	I	I	.	I	I	.	S	Q	.	T	R	.	L	.	N	.	A	L	V	T	.	.	.	K	.	.	.	V	.	I	.	I	.	.	S	A	Y	I	V	.	N	.	M	V	.	.	T
	A/duck/Vietnam/QT1726/2013	V	I	I	.	I	I	.	S	Q	.	T	R	.	L	G	N	.	A	.	V	T	.	.	.	K	.	.	.	V	.	I	.	I	.	.	S	A	Y	I	V	.	N	S	I	V	.	.	T
	A/duck/Vietnam/QT1727/2013	V	I	I	.	I	I	.	S	Q	.	T	R	.	L	G	N	.	A	.	V	T	.	.	.	K	.	.	.	V	.	I	.	I	.	.	S	A	Y	I	V	.	N	S	I	V	.	.	T
	A/duck/Vietnam/QT1728/2013	V	I	I	.	I	I	.	S	Q	.	T	R	.	L	G	N	.	A	.	V	T	.	.	.	K	.	.	.	V	.	I	.	I	.	.	S	A	Y	I	V	.	N	S	I	V	.	.	T
	A/duck/Vietnam/QT1729/2013	V	I	I	.	I	I	.	S	Q	.	T	R	.	L	G	N	.	A	.	V	T	.	.	.	K	.	.	.	V	.	I	.	I	.	.	S	A	Y	I	V	.	N	S	I	V	.	.	T
	A/duck/Vietnam/QT1730/2013	V	I	I	.	I	I	.	S	Q	.	T	R	.	L	G	N	.	A	.	V	T	.	.	.	K	.	.	.	V	.	I	.	I	.	.	S	A	Y	I	V	.	N	S	I	V	.	.	T
	A/duck/Vietnam/LS101/2013	V	I	I	.	I	I	.	S	Q	.	T	R	.	L	.	N	.	A	L	V	T	.	.	.	K	.	.	.	V	.	I	.	I	.	.	S	A	Y	I	V	.	N	.	M	V	.	.	T
	A/muscovy duck/Vietnam/LS154/2013	V	I	I	.	I	I	.	S	Q	.	T	R	.	L	.	N	.	A	.	V	T	.	.	.	K	.	.	.	V	.	I	.	I	.	.	S	A	Y	I	V	.	N	.	M	V	.	.	T
2.3.4.1	A/chicken/Vietnam/QT517/2009	.	.	.	T	I	I	M	S	Q	R	T	R	.	L	.	N	V	A	.	V	T	.	.	.	R	.	.	.	V	.	.	.	.	.	.	S	.	Y	.	V	.	N	.	I	V	.	K	T
	A/chicken/Vietnam/TY167/2010	.	.	.	.	I	I	M	S	Q	R	.	R	.	L	.	N	.	A	.	V	T	.	L	.	R	.	N	.	V	.	.	.	.	.	.	S	.	Y	.	V	.	N	.	I	V	.	.	T
	A/chicken/Vietnam/TY168/2010	.	.	.	.	I	I	M	S	Q	R	.	R	.	L	.	N	.	A	.	V	T	.	L	.	R	.	N	.	V	.	.	.	.	.	.	S	.	Y	.	V	.	N	.	I	V	.	.	T
[truncated: 13 more columns]

## Sheet: M1
Table S2. Comparison of the consensus sequences of the isolated viruses (the sequence of A/duck/Vietnam/ST1488-1/2012 served as the reference sequence)
Clade	Virus Isolate	Amino Acid Position (M1)
		78	205
1.1.2	A/duck/Vietnam/ST1488-1/2012	R	I
	A/duck/Vietnam/ST1488-2/2012	.	.
	A/duck/Vietnam/ST1488-3/2012	.	.
	A/duck/Vietnam/ST1489-1/2012	.	.
	A/duck/Vietnam/ST1489-2/2012	.	.
	A/duck/Vietnam/ST1489-3/2012	.	.
	A/duck/Vietnam/ST1490-1/2012	.	.
	A/duck/Vietnam/ST1490-2/2012	.	.
	A/duck/Vietnam/ST1490-3/2012	.	.
	A/duck/Vietnam/ST1491-1/2012	.	.
	A/duck/Vietnam/ST1491-2/2012	.	.
	A/duck/Vietnam/ST1491-3/2012	.	.
	A/duck/Vietnam/ST1551-3/2012	.	.
2.3.2.1a	A/duck/Vietnam/TY165/2010	.	V
	A/duck/Vietnam/TY166/2010	.	V
	A/duck/Vietnam/LS1352/2011	.	.
	A/duck/Vietnam/LS1353/2011	.	.
	A/duck/Vietnam/LS1354/2011	.	.
	A/duck/Vietnam/TY151/2011	.	.
	A/duck/Vietnam/TY152/2011	.	.
	A/duck/Vietnam/QT1455-1/2012	.	V
	A/duck/Vietnam/QT1455-2/2012	.	V
	A/duck/Vietnam/QT1455-3/2012	.	V
	A/duck/Vietnam/QT1456-1/2012	.	V
	A/duck/Vietnam/QT1456-2/2012	.	V
	A/duck/Vietnam/QT1456-3/2012	.	V
	A/duck/Vietnam/QT1457-1/2012	.	V
	A/duck/Vietnam/QT1457-2/2012	.	V
	A/duck/Vietnam/QT1457-3/2012	.	V
	A/duck/Vietnam/QT1458-1/2012	.	V
	A/duck/Vietnam/QT1458-2/2012	.	V
	A/duck/Vietnam/QT1458-3/2012	.	V
	A/duck/Vietnam/QT1479/2012	.	V
	A/duck/Vietnam/QT1480/2012	.	V
	A/duck/Vietnam/QT1481/2012	.	V
	A/duck/Vietnam/QT1483/2012	.	V
	A/duck/Vietnam/QT1484/2012	.	V
2.3.2.1b	A/duck/Vietnam/LS1349/2011	P	V
2.3.2.1c	A/swallow/Vietnam/NT22/2013	.	V
	A/swallow/Vietnam/NT24/2013	.	V
	A/swallow/Vietnam/NT25/2013	.	V
	A/muscovy duck/Vietnam/BG80-1/2013	.	V
	A/muscovy duck/Vietnam/BG80-2/2013	.	V
	A/duck/Vietnam/QT1726/2013	.	V
	A/duck/Vietnam/QT1727/2013	.	V
	A/duck/Vietnam/QT1728/2013	.	V
	A/duck/Vietnam/QT1729/2013	.	V
	A/duck/Vietnam/QT1730/2013	.	V
	A/duck/Vietnam/LS101/2013	.	V
	A/muscovy duck/Vietnam/LS154/2013	.	V
2.3.4.1	A/chicken/Vietnam/QT517/2009	.	V
	A/chicken/Vietnam/TY167/2010	.	V
	A/chicken/Vietnam/TY168/2010	.	V

## Sheet: M2
Table S2. Comparison of the consensus sequences of the isolated viruses (the sequence of A/duck/Vietnam/ST1488-1/2012 served as the reference sequence)
Clade	Virus Isolate	Amino Acid Position (M2)
		11	13	16	17	19	20	26	27	28	31	54	58	62	64	66	68	82	89	95
1.1.2	A/duck/Vietnam/ST1488-1/2012	T	N	E	C	C	S	I	V	V	N	R	D	G	A	A	I	S	G	E
	A/duck/Vietnam/ST1488-2/2012	.	.	.	.	.	.	.	.	.	.	.	.	.	.	.	.	.	.	.
	A/duck/Vietnam/ST1488-3/2012	.	.	.	.	.	.	.	.	.	.	.	.	.	.	.	.	.	.	.
	A/duck/Vietnam/ST1489-1/2012	.	.	.	.	.	.	.	.	.	.	.	.	.	.	.	.	.	.	.
	A/duck/Vietnam/ST1489-2/2012	.	.	.	.	.	.	.	.	.	.	.	.	.	.	.	.	.	.	.
	A/duck/Vietnam/ST1489-3/2012	.	.	.	.	.	.	.	.	.	.	.	.	.	.	.	.	.	.	.
	A/duck/Vietnam/ST1490-1/2012	.	.	.	.	.	.	.	.	.	.	.	.	.	.	.	.	.	.	.
	A/duck/Vietnam/ST1490-2/2012	.	.	.	.	.	.	.	.	.	.	.	.	.	.	.	.	.	.	.
	A/duck/Vietnam/ST1490-3/2012	.	.	.	.	.	.	.	.	.	.	.	.	.	.	.	.	.	.	.
	A/duck/Vietnam/ST1491-1/2012	.	.	.	.	.	.	.	.	.	.	.	.	A	.	.	.	.	.	.
	A/duck/Vietnam/ST1491-2/2012	.	.	.	.	.	.	.	.	.	.	.	.	A	.	.	.	.	.	.
	A/duck/Vietnam/ST1491-3/2012	.	.	.	.	.	.	.	.	.	.	.	.	A	.	.	.	.	.	.
	A/duck/Vietnam/ST1551-3/2012	.	.	.	.	.	.	.	.	.	.	C	.	.	.	.	.	.	.	.
2.3.2.1a	A/duck/Vietnam/TY165/2010	.	K	.	.	.	.	L	.	.	S	.	G	.	S	E	V	N	.	.
	A/duck/Vietnam/TY166/2010	.	K	.	.	.	.	L	.	.	S	.	G	.	S	E	V	N	.	.
	A/duck/Vietnam/LS1352/2011	.	K	.	.	.	.	L	.	.	S	.	G	.	S	E	V	N	.	.
	A/duck/Vietnam/LS1353/2011	.	K	.	.	.	.	L	.	.	S	.	G	.	S	E	V	N	.	.
	A/duck/Vietnam/LS1354/2011	.	K	.	.	.	.	L	.	.	S	.	G	.	S	E	V	N	.	.
	A/duck/Vietnam/TY151/2011	.	K	.	.	.	.	L	.	.	S	.	G	.	S	E	V	N	.	.
	A/duck/Vietnam/TY152/2011	.	K	.	.	.	.	L	.	.	S	.	G	.	S	E	V	N	.	.
	A/duck/Vietnam/QT1455-1/2012	.	.	.	.	.	.	L	.	.	S	.	G	.	S	E	V	N	.	.
	A/duck/Vietnam/QT1455-2/2012	.	.	.	.	.	.	L	.	.	S	.	G	.	S	E	V	N	.	.
	A/duck/Vietnam/QT1455-3/2012	.	.	.	.	.	.	L	.	.	S	.	G	.	S	E	V	N	.	.
	A/duck/Vietnam/QT1456-1/2012	.	.	.	.	.	.	L	.	.	S	.	G	.	S	E	V	N	.	.
	A/duck/Vietnam/QT1456-2/2012	.	.	.	.	.	.	L	.	.	S	.	G	.	S	E	V	N	.	.
	A/duck/Vietnam/QT1456-3/2012	.	.	.	.	.	.	L	.	.	S	.	G	.	S	E	V	N	.	.
	A/duck/Vietnam/QT1457-1/2012	.	.	.	.	.	.	L	.	.	S	.	G	.	S	E	V	N	.	.
	A/duck/Vietnam/QT1457-2/2012	.	.	.	.	.	.	L	.	.	S	.	G	.	S	E	V	N	.	.
	A/duck/Vietnam/QT1457-3/2012	.	.	.	.	.	.	L	.	.	S	.	G	.	S	E	V	N	.	.
	A/duck/Vietnam/QT1458-1/2012	.	.	.	.	.	.	L	.	.	S	.	G	.	S	E	V	N	.	.
	A/duck/Vietnam/QT1458-2/2012	.	.	.	.	.	.	L	.	.	S	.	G	.	S	E	V	N	.	.
	A/duck/Vietnam/QT1458-3/2012	.	.	.	.	.	.	L	.	.	S	.	G	.	S	E	V	N	.	.
	A/duck/Vietnam/QT1479/2012	.	.	.	.	.	.	L	.	.	S	.	G	.	S	E	V	N	.	.
	A/duck/Vietnam/QT1480/2012	.	.	.	.	.	.	L	.	.	S	.	G	.	S	E	V	N	.	.
	A/duck/Vietnam/QT1481/2012	.	.	.	.	.	.	L	.	.	S	.	G	.	S	E	V	N	.	.
	A/duck/Vietnam/QT1483/2012	.	.	.	.	.	.	L	.	.	S	.	G	.	S	E	V	N	.	.
	A/duck/Vietnam/QT1484/2012	.	K	.	.	.	.	L	.	.	S	.	G	.	S	E	V	N	.	.
2.3.2.1b	A/duck/Vietnam/LS1349/2011	.	.	.	.	Y	.	L	.	.	S	.	G	.	S	E	V	N	.	.
2.3.2.1c	A/swallow/Vietnam/NT22/2013	.	.	.	.	.	.	L	I	.	S	.	G	.	S	E	V	N	.	.
	A/swallow/Vietnam/NT24/2013	.	.	.	.	.	.	L	I	.	S	.	G	.	S	E	V	N	.	.
	A/swallow/Vietnam/NT25/2013	.	.	.	.	.	.	L	I	.	S	.	G	.	S	E	V	N	.	.
	A/muscovy duck/Vietnam/BG80-1/2013	I	.	.	.	.	.	L	.	.	S	.	G	.	S	E	V	N	S	G
	A/muscovy duck/Vietnam/BG80-2/2013	I	.	.	.	.	.	L	.	.	S	.	G	.	S	E	V	N	S	G
	A/duck/Vietnam/QT1726/2013	.	.	G	.	.	.	L	I	.	S	.	G	.	S	E	V	N	.	.
	A/duck/Vietnam/QT1727/2013	.	.	G	.	.	.	L	I	.	S	.	G	.	S	E	V	N	.	.
	A/duck/Vietnam/QT1728/2013	.	.	G	.	.	.	L	I	.	S	.	G	.	S	E	V	N	.	.
	A/duck/Vietnam/QT1729/2013	.	.	G	.	.	.	L	I	.	S	.	G	.	S	E	V	N	.	.
	A/duck/Vietnam/QT1730/2013	.	.	G	.	.	.	L	I	.	S	.	G	.	S	E	V	N	.	.
	A/duck/Vietnam/LS101/2013	I	.	.	.	.	.	L	.	.	S	.	G	.	S	E	V	N	S	G
	A/muscovy duck/Vietnam/LS154/2013	I	.	.	.	.	.	L	.	.	S	.	G	.	S	E	V	N	S	G
2.3.4.1	A/chicken/Vietnam/QT517/2009	.	.	.	.	.	N	L	.	I	S	.	G	.	S	E	V	.	.	.
	A/chicken/Vietnam/TY167/2010	.	.	.	F	.	N	L	.	I	S	.	G	.	S	E	V	.	.	.
	A/chicken/Vietnam/TY168/2010	.	.	.	F	.	N	L	.	I	S	.	G	.	S	E	V	.	.	.

## Sheet: NS1
Table S2. Comparison of the consensus sequences of the isolated viruses (the sequence of A/duck/Vietnam/ST1488-1/2012 served as the reference sequence)
Clade	Virus Isolate	Amino Acid Position [NS1; upper row: numbering for NS1 possessing a 5-amino acid deletion (Δ80-84); lower row: full-length NS1]
		27	55	59	70	73	75	79	80	81	83	87	91	93	96	105	107	118	122	123	132	133	134	138	148	150	166	171	175	188	189	190	193	199	200	201	204	207	208	212	214	216	217	219	220	222
		27	55	59	70	73	75	79	85	86	88	92	96	98	101	110	112	123	127	128	137	138	139	143	153	155	171	176	180	193	194	195	198	204	205	206	209	212	213	217	219	221	222	224	225	227
1.1.2	A/duck/Vietnam/ST1488-1/2012	M	E	C	E	S	K	M	P	V	R	D	E	M	D	R	A	I	A	I	T	F	G	N	E	T	G	N	I	Q	V	T	I	G	S	S	V	P	P	N	N	K	V	G	T	E
	A/duck/Vietnam/ST1488-2/2012	.	.	.	.	.	.	.	.	.	.	.	.	.	.	.	.	.	.	.	.	.	.	.	.	.	.	.	.	.	.	.	.	.	.	.	.	.	.	.	.	.	.	.	.	.
	A/duck/Vietnam/ST1488-3/2012	.	.	.	.	.	.	.	.	.	.	.	.	.	.	.	.	.	.	.	.	.	.	.	.	.	.	.	.	.	.	.	.	.	.	.	.	.	.	.	.	.	.	.	.	.
	A/duck/Vietnam/ST1489-1/2012	.	.	.	.	.	.	.	.	.	.	.	.	.	.	.	.	.	.	.	.	.	.	.	.	.	.	.	.	.	.	.	.	.	.	.	.	.	.	.	.	.	.	.	.	.
	A/duck/Vietnam/ST1489-2/2012	.	.	.	.	.	.	.	.	.	.	.	.	.	.	.	.	.	.	.	.	.	.	.	.	.	.	.	.	.	.	.	.	.	.	.	.	.	.	.	.	.	.	.	.	.
	A/duck/Vietnam/ST1489-3/2012	.	.	.	.	.	.	.	.	.	.	.	.	.	.	.	.	.	.	.	.	.	.	.	.	.	.	.	.	.	.	.	.	.	.	.	.	.	.	.	.	.	.	.	.	.
	A/duck/Vietnam/ST1490-1/2012	.	.	.	.	.	.	.	.	.	.	.	.	.	.	.	.	.	.	.	.	.	.	.	.	.	.	.	.	.	.	.	.	.	.	.	.	.	.	.	.	.	.	.	.	.
	A/duck/Vietnam/ST1490-2/2012	.	.	.	.	.	.	.	.	.	.	.	.	.	.	.	.	.	.	.	.	.	.	.	.	.	.	.	.	.	.	.	.	.	.	.	.	.	.	.	.	.	.	.	.	.
	A/duck/Vietnam/ST1490-3/2012	.	.	.	.	.	.	.	.	.	.	.	.	.	.	.	.	.	.	.	.	.	.	.	.	.	.	.	.	.	.	.	.	.	.	.	.	.	.	.	.	.	.	.	.	.
	A/duck/Vietnam/ST1491-1/2012	.	.	.	.	.	.	.	.	.	.	.	.	.	.	.	.	.	.	.	.	.	.	.	.	.	.	.	.	.	.	.	.	.	.	.	.	.	.	.	.	.	.	.	.	.
	A/duck/Vietnam/ST1491-2/2012	.	.	.	.	.	.	.	.	.	.	.	.	.	.	.	.	.	.	.	.	.	.	.	.	.	.	.	.	.	.	.	.	.	.	.	.	.	.	.	.	.	.	.	.	.
	A/duck/Vietnam/ST1491-3/2012	.	.	.	.	.	.	.	.	.	.	.	.	.	.	.	.	.	.	.	.	.	.	.	.	.	.	.	.	.	.	.	.	.	.	.	.	.	.	.	.	.	.	.	.	.
	A/duck/Vietnam/ST1551-3/2012	L	K	.	.	.	.	.	.	.	.	.	.	.	.	K	.	.	.	.	.	.	.	.	.	.	.	.	.	.	.	.	.	.	.	.	.	.	.	.	.	.	.	.	.	G
2.3.2.1a	A/duck/Vietnam/TY165/2010	L	.	R	N	.	E	.	.	T	.	.	.	.	.	K	V	M	T	V	I	.	D	T	.	A	R	.	V	R	I	S	.	R	.	.	G	L	.	K	K	.	M	R	.	.
	A/duck/Vietnam/TY166/2010	L	.	R	N	.	E	.	.	T	.	.	.	.	.	K	V	M	T	V	I	.	D	T	.	A	R	.	V	R	I	S	.	R	.	.	G	L	.	K	K	.	M	R	.	.
	A/duck/Vietnam/LS1352/2011	L	.	R	D	.	E	.	.	T	.	.	.	.	.	K	V	M	T	V	I	.	D	T	.	A	R	.	V	R	I	S	.	R	.	.	G	L	.	.	K	.	M	R	.	.
	A/duck/Vietnam/LS1353/2011	L	.	R	D	.	E	.	.	T	.	.	.	.	.	K	V	M	T	V	I	.	D	T	.	A	R	.	V	R	I	S	.	R	.	.	G	L	.	.	K	.	M	R	.	.
	A/duck/Vietnam/LS1354/2011	L	.	R	D	.	E	.	.	T	.	.	.	.	.	K	V	M	T	V	I	.	D	T	.	A	R	.	V	R	I	S	.	R	.	.	G	L	.	.	K	.	M	R	.	.
	A/duck/Vietnam/TY151/2011	L	.	R	D	.	E	.	.	T	.	.	.	.	.	K	V	M	T	V	I	.	D	T	.	A	R	.	V	R	I	S	.	R	.	.	G	L	.	.	K	.	M	R	.	.
	A/duck/Vietnam/TY152/2011	L	.	R	D	.	E	.	.	T	.	.	.	.	.	K	V	M	T	V	I	.	D	T	.	A	R	.	V	R	I	S	.	R	.	.	G	L	.	.	K	.	M	R	.	.
	A/duck/Vietnam/QT1455-1/2012	L	.	R	D	P	E	.	.	T	.	E	.	.	.	K	V	.	T	.	I	.	D	T	K	A	.	.	V	R	.	S	.	R	.	.	G	L	.	.	K	.	L	R	A	.
	A/duck/Vietnam/QT1455-2/2012	L	.	R	D	P	E	.	.	T	.	E	.	.	.	K	V	.	T	.	I	.	D	T	K	A	.	.	V	R	.	S	.	R	.	.	G	L	.	.	K	.	L	R	A	.
	A/duck/Vietnam/QT1455-3/2012	L	.	R	D	P	E	.	.	T	.	E	.	.	.	K	V	.	T	.	I	.	D	T	K	A	.	.	V	R	.	S	.	R	.	.	G	L	.	.	K	.	L	R	A	.
	A/duck/Vietnam/QT1456-1/2012	L	.	R	D	P	E	.	.	T	.	E	.	.	.	K	V	.	T	.	I	.	D	T	K	A	.	.	V	R	.	S	.	R	.	.	G	L	.	.	K	.	L	R	A	.
	A/duck/Vietnam/QT1456-2/2012	L	.	R	D	P	E	.	.	T	.	E	.	.	.	K	V	.	T	.	I	.	D	T	K	A	.	.	V	R	.	S	.	R	.	.	G	L	.	.	K	.	L	R	A	.
	A/duck/Vietnam/QT1456-3/2012	L	.	R	D	P	E	.	.	T	.	E	.	.	.	K	V	.	T	.	I	.	D	T	K	A	.	.	V	R	.	S	.	R	.	.	G	L	.	.	K	.	L	R	A	.
	A/duck/Vietnam/QT1457-1/2012	L	.	R	D	P	E	.	.	T	.	E	.	.	.	K	V	.	T	.	I	.	D	T	K	A	.	.	V	R	.	S	.	R	.	.	G	L	.	.	K	.	L	R	A	.
	A/duck/Vietnam/QT1457-2/2012	L	.	R	D	P	E	.	.	T	.	E	.	.	.	K	V	.	T	.	I	.	D	T	K	A	.	.	V	R	.	S	.	R	.	.	G	L	.	.	K	.	L	R	A	.
	A/duck/Vietnam/QT1457-3/2012	L	.	R	D	P	E	.	.	T	.	E	.	.	.	K	V	.	T	.	I	.	D	T	K	A	.	.	V	R	.	S	.	R	.	.	G	L	.	.	K	.	L	R	A	.
	A/duck/Vietnam/QT1458-1/2012	L	.	R	D	P	E	.	.	T	.	E	.	.	.	K	V	.	T	.	I	.	D	T	K	A	.	.	V	R	.	S	.	R	.	.	G	L	.	.	K	.	L	R	A	.
	A/duck/Vietnam/QT1458-2/2012	L	.	R	D	P	E	.	.	T	.	E	.	.	.	K	V	.	T	.	I	.	D	T	K	A	.	.	V	R	.	S	.	R	.	.	G	L	.	.	K	.	L	R	A	.
	A/duck/Vietnam/QT1458-3/2012	L	.	R	D	P	E	.	.	T	.	E	.	.	.	K	V	.	T	.	I	.	D	T	K	A	.	.	V	R	.	S	.	R	.	.	G	L	.	.	K	.	L	R	A	.
	A/duck/Vietnam/QT1479/2012	L	.	R	D	P	E	.	.	T	.	E	.	.	.	K	V	.	T	.	I	.	D	T	.	A	.	.	V	R	.	S	.	R	.	.	G	L	.	.	K	.	L	R	A	.
	A/duck/Vietnam/QT1480/2012	L	.	R	D	P	E	.	.	T	.	E	.	.	.	K	V	.	T	.	I	.	D	T	.	A	.	.	V	R	.	S	.	R	.	.	G	L	.	.	K	.	L	R	A	.
	A/duck/Vietnam/QT1481/2012	L	.	R	D	P	E	.	.	T	.	E	.	.	.	K	V	.	T	.	I	.	D	T	.	A	.	.	V	R	.	S	.	R	.	.	G	L	.	.	K	.	L	R	A	.
	A/duck/Vietnam/QT1483/2012	L	.	R	D	P	E	.	.	T	.	E	.	.	.	K	V	.	T	.	I	.	D	T	.	A	.	.	V	R	.	S	.	R	.	.	G	L	.	.	K	.	L	R	A	.
	A/duck/Vietnam/QT1484/2012	L	.	R	D	.	E	I	.	T	.	.	.	.	.	K	V	M	T	V	I	.	D	T	.	A	R	.	V	R	I	S	.	R	.	.	G	L	.	.	K	.	M	R	.	.
2.3.2.1b	A/duck/Vietnam/LS1349/2011	L	.	R	D	P	E	V	.	T	.	E	.	.	N	K	V	.	T	.	I	.	D	T	.	A	.	.	V	R	.	S	V	R	.	.	G	L	.	.	K	T	L	R	A	.
2.3.2.1c	A/swallow/Vietnam/NT22/2013	L	.	R	D	P	E	.	.	T	.	E	.	V	.	K	M	.	T	.	I	.	D	T	.	A	D	T	V	R	.	S	.	R	N	N	G	L	.	.	K	.	L	R	A	.
	A/swallow/Vietnam/NT24/2013	L	.	R	D	P	E	.	.	T	.	E	.	V	.	K	M	.	T	.	I	.	D	T	.	A	D	T	V	R	.	S	.	R	N	N	G	L	.	.	K	.	L	R	A	.
	A/swallow/Vietnam/NT25/2013	L	.	R	D	P	E	.	.	T	.	E	.	V	.	K	M	.	T	.	I	.	D	T	.	A	D	T	V	R	.	S	.	R	N	N	G	L	.	.	K	.	L	R	A	.
	A/muscovy duck/Vietnam/BG80-1/2013	L	.	R	D	P	E	.	.	T	Y	E	K	.	.	K	M	.	T	.	I	.	D	T	.	A	.	.	V	R	.	S	.	R	N	.	G	L	.	.	K	.	L	R	A	.
	A/muscovy duck/Vietnam/BG80-2/2013	L	.	R	D	P	E	.	.	T	Y	E	K	.	.	K	M	.	T	.	I	.	D	T	.	A	.	.	V	R	.	S	.	R	N	.	G	L	.	.	K	.	L	R	A	.
	A/duck/Vietnam/QT1726/2013	L	.	R	D	P	E	.	.	T	.	E	.	.	.	.	M	.	T	.	I	.	D	T	.	A	.	.	V	R	.	S	.	R	N	.	G	L	S	.	K	.	L	R	A	.
	A/duck/Vietnam/QT1727/2013	L	.	R	D	P	E	.	.	T	.	E	.	.	.	.	M	.	T	.	I	.	D	T	.	A	.	.	V	R	.	S	.	R	N	.	G	L	S	.	K	.	L	R	A	.
	A/duck/Vietnam/QT1728/2013	L	.	R	D	P	E	.	.	T	.	E	.	.	.	.	M	.	T	.	I	.	D	T	.	A	.	.	V	R	.	S	.	R	N	.	G	L	S	.	K	.	L	R	A	.
	A/duck/Vietnam/QT1729/2013	L	.	R	D	P	E	.	.	T	.	E	.	.	.	.	M	.	T	.	I	.	D	T	.	A	.	.	V	R	.	S	.	R	N	.	G	L	S	.	K	.	L	R	A	.
	A/duck/Vietnam/QT1730/2013	L	.	R	D	P	E	.	.	T	.	E	.	.	.	.	M	.	T	.	I	.	D	T	.	A	.	.	V	R	.	S	.	R	N	.	G	L	S	.	K	.	L	R	A	.
	A/duck/Vietnam/LS101/2013	L	.	R	D	A	.	.	.	T	H	E	.	.	.	K	M	.	T	.	I	.	D	T	.	A	.	.	V	R	.	S	.	R	N	.	G	L	.	.	K	.	L	R	A	.
	A/muscovy duck/Vietnam/LS154/2013	L	.	R	D	P	E	.	.	T	H	E	.	.	.	K	M	.	T	.	I	.	D	T	.	A	.	.	V	R	.	S	.	R	N	.	G	L	.	.	K	.	L	R	A	.
2.3.4.1	A/chicken/Vietnam/QT517/2009	.	.	R	.	.	E	.	S	A	.	.	.	.	.	K	.	.	T	.	I	C	D	T	.	A	.	.	V	R	I	S	L	R	.	.	G	L	.	.	K	.	M	R	.	.
	A/chicken/Vietnam/TY167/2010	.	.	R	.	.	E	.	S	A	.	.	.	.	.	K	.	.	T	.	I	C	D	T	.	A	.	.	V	R	.	S	L	R	.	.	G	L	.	.	K	.	M	R	.	.
	A/chicken/Vietnam/TY168/2010	.	.	R	.	.	E	.	S	A	.	.	.	.	.	K	.	.	T	.	I	C	D	T	.	A	.	.	V	R	.	S	L	R	.	.	G	L	.	.	K	.	M	R	.	.

[truncated: 1 more sheets: NS2]
