# Supplementary material for: Isolation of Highly Pathogenic H5N1 Influenza Viruses in 2009–2013 in Vietnam
Source: Front Microbiol. 2019 Jun 25;10:1411. doi: 10.3389/fmicb.2019.01411 (PMC6603144; doi:10.3389/fmicb.2019.01411)
Supplement: TABLE S3 — Summary of deep-sequencing data: shown are non-synonymous SNPs found at a frequency ≥1% that passed our quality control (see the section “Materials and Methods”); data are sorted by viral protein and, for each protein, by the frequency of the SNP. [file Table_3.xlsx]

## Sheet: Combined
Table S3. Summary of deep-sequencing data: Shown are non-synonymous single-nucleotide polymorphisms (SNPs) found at a frequency ≥1% that passed our quality control (see Materials & Methods); data are sorted by viral protein and, for each protein, by the frequency of the SNP
Viral Protein	Nucleotide Position	Reference Nucleotide	Alternate Nucleotide	Coverage	Variant Rate (%)	Amino Acid Position*	Amino Acid Change	Virus Isolate	Comment	Reference (PMID #)
PB2	293	T	C	6241	18.7829	89	V>A	A/duck/Vietnam/LS101/2013
PB2	192	C	A	1052	15.4811	55	Y>*	A/duck/Vietnam/ST1488-2/2012
PB2	165	A	C	1796	14.2969	46	R>S	A/Duck/Vietnam/QT1727/2013
PB2	2050	T	A	1056	11.727	675	L>I	A/duck/Vietnam/ST1488-2/2012
PB2	886	A	G	6731	9.44079	287	T>A	A/duck/Vietnam/ST1551-3/2012
PB2	1762	C	T	6056	8.52796	579	P>S	A/Muscovy duck/Vietnam/BG80-2/2013
PB2	2179	A	G	26362	6.47204	718	K>E	A/Swallow/Vietnam/NT25/2013
PB2	192	C	A	1035	6.06908	55	Y>*	A/duck/Vietnam/ST1488-3/2012
PB2	2009	C	T	4892	5.74836	661	A>V	A/Muscovy duck/Vietnam/BG80-2/2013	V>A: Enhance pH1N1 polymerase activity at 34°C	26018156
PB2	481	G	T	2959	5.49342	152	A>S	A/muscovy duck/LS154/2013
PB2	2083	G	C	1640	5.41118	686	V>L	A/duck/Vietnam/QT1457-2/2012
PB2	2151	G	C	7947	4.70395	708	L>F	A/Duck/Vietnam/QT1727/2013
PB2	2050	T	A	1379	4.69572	675	L>I	A/duck/Vietnam/ST1488-3/2012
PB2	168	G	C	1538	4.27632	47	M>I	A/Duck/Vietnam/QT1727/2013
PB2	2099	T	A	3666	3.28125	691	L>Q	A/duck/Vietnam/ST1488-1/2012
PB2	2048	C	A	1327	3.22368	674	A>E	A/duck/Vietnam/ST1488-3/2012
PB2	257	T	A	1117	3.10855	77	L>H	A/duck/Vietnam/ST1490-1/2012
PB2	1964	G	A	1987	2.90296	646	R>K	A/Duck/Vietnam/QT1730/2013
PB2	1964	G	A	2414	2.80428	646	R>K	A/Duck/Vietnam/QT1729/2013
PB2	2099	T	A	3849	2.75493	691	L>Q	A/duck/Vietnam/ST1488-2/2012
PB2	1889	T	A	1331	2.52467	621	F>Y	A/duck/Vietnam/ST1490-1/2012
PB2	589	G	A	26450	2.37253	188	E>K	A/Muscovy duck/Vietnam/BG80-1/2013
PB2	367	G	A	34754	2.34581	114	V>I	A/Swallow/Vietnam/NT24/2013
PB2	1327	C	T	13500	2.26768	434	L>F	A/duck/Vietnam/LS101/2013
PB2	2111	T	C	2075	2.24507	695	L>P	A/Duck/Vietnam/QT1727/2013
PB2	1465	G	A	2894	2.09704	480	V>I	A/duck/Vietnam/QT1484/2012
PB2	1370	A	C	9325	2.04564	448	N>T	A/Duck/Vietnam/QT1726/2013
PB2	1330	C	A	6199	2.01891	435	L>M	A/Muscovy duck/Vietnam/BG80-2/2013
PB2	324	G	A	2782	1.82155	99	W>*	A/duck/Vietnam/ST1491-1/2012
PB2	1888	T	G	1331	1.69408	621	F>V	A/duck/Vietnam/ST1490-1/2012
PB2	931	C	T	3265	1.64474	302	P>S	A/duck/Vietnam/ST1490-2/2012
PB2	491	G	A	1462	1.62007	155	S>N	A/duck/Vietnam/ST1489-1/2012
PB2	259	T	C	1091	1.52961	78	W>R	A/duck/Vietnam/ST1490-1/2012
PB2	2081	G	T	1558	1.45559	685	G>V	A/duck/Vietnam/QT1457-2/2012
PB2	2116	C	A	5270	1.3898	697	L>I	A/duck/Vietnam/ST1491-1/2012
PB2	2057	A	G	3220	1.3199	677	E>G	A/muscovy duck/LS154/2013
PB2	1459	G	A	1008	1.27878	478	V>I	A/duck/Vietnam/ST1488-3/2012	Differs between clade 2.3.4.1 and clades 1.1.2, 2.3.2.1a, 2.3.2.1c (see Table S2)
									V>L: Contributes to the temperature-sensitive phenotype of live-attenuated Leningrad influenza vaccine	23555969
PB2	2098	C	G	3679	1.27467	691	L>V	A/duck/Vietnam/ST1488-2/2012
PB2	180	G	A	2716	1.20066	51	M>I	A/muscovy duck/LS154/2013
PB2	304	C	T	1400	1.19655	93	P>S	A/duck/Vietnam/ST1489-1/2012
PB2	2098	C	G	3485	1.1472	691	L>V	A/duck/Vietnam/ST1488-1/2012
PB2	884	G	A	10517	1.13487	286	S>N	A/Swallow/Vietnam/NT25/2013
PB2	2140	G	T	5111	1.13487	705	G>*	A/muscovy duck/LS154/2013
PB2	181	G	C	3887	1.09375	52	A>P	A/duck/Vietnam/QT1457-2/2012
PB2	1790	C	G	28420	1.09272	588	T>S	A/Muscovy duck/Vietnam/BG80-1/2013	Differs between clade 1.1.2 and clades 2.3.2.1a, 2.3.2.1c (see Table S2)
									A>T: Contributes to increased virulence of H5N1	25289523
									T>I: Increased pH1N1 polymerase activity and virulence	24335306
									A>V: Increased H10N8, H7N9 & H9N2 polymerase activity and virulence	26782141
PB2	170	A	C	3520	1.03207	48	K>T	A/muscovy duck/LS154/2013
PB2	1963	A	G	2094	1.03207	646	R>G	A/Duck/Vietnam/QT1729/2013
PB2	192	C	G	6135	1.02385	55	Y>*	A/duck/Vietnam/ST1491-1/2012
PB2	2053	A	G	2907	1.01562	676	T>A	A/Duck/Vietnam/QT1728/2013	Differs between clade 2.3.4.1 and clades 1.1.2, 2.3.2.1a, 2.3.2.1c (see Table S2)
PB1	1402	C	A	1801	44.7502	460	Q>K	A/Duck/Vietnam/QT1727/2013
PB1	28	G	A	14004	44.1694	2	D>N	A/Duck/Vietnam/QT1727/2013	Differs within clade 2.3.2.1c (see Table S2)
PB1	185	G	T	1729	40.0822	54	G>V	A/Duck/Vietnam/QT1726/2013	Differs between clade 1.1.2 and clades 2.3.2.1a, 2.3.2.1c (see Table S2)
PB1	1402	C	A	3019	32.9544	460	Q>K	A/Duck/Vietnam/QT1730/2013
PB1	1402	C	A	2656	32.4486	460	Q>K	A/Duck/Vietnam/QT1729/2013
PB1	1184	A	G	9401	26.5419	387	K>R	A/Muscovy duck/Vietnam/BG80-1/2013	Differs within clade 2.3.2.1c (see Table S2)
PB1	121	T	G	1804	19.3914	33	W>G	A/muscovy duck/LS154/2013
PB1	2105	A	T	14160	16.949	694	N>I	A/Swallow/Vietnam/NT25/2013
PB1	2024	T	C	3567	15.4688	667	I>T	A/muscovy duck/LS154/2013
PB1	28	G	A	3589	13.5074	2	D>N	A/Duck/Vietnam/QT1726/2013	Differs within clade 2.3.2.1c (see Table S2)
PB1	1184	G	A	26551	13.4396	387	R>K	A/Muscovy duck/Vietnam/BG80-2/2013	Differs within clade 2.3.2.1c (see Table S2)
PB1	2061	A	T	3167	11.8668	679	Q>H	A/duck/Vietnam/ST1488-1/2012
PB1	1463	A	G	1855	6.02796	480	K>R	A/duck/Vietnam/ST1489-3/2012	Differs within clade 2.3.2.1c (see Table S2)
PB1	244	C	A	1817	5.32072	74	P>T	A/Duck/Vietnam/QT1727/2013
PB1	2107	C	G	2617	5.13158	695	L>V	A/Swallow/Vietnam/NT24/2013
PB1	1961	T	C	12066	4.43668	646	M>T	A/duck/Vietnam/LS101/2013
PB1	2061	A	T	2810	4.36678	679	Q>H	A/duck/Vietnam/ST1488-2/2012
PB1	1402	C	A	10442	4.33388	460	Q>K	A/Muscovy duck/Vietnam/BG80-1/2013
PB1	1402	C	A	4213	4.2352	460	Q>K	A/duck/Vietnam/ST1491-2/2012
PB1	1402	C	A	3880	3.95559	460	Q>K	A/duck/Vietnam/ST1491-1/2012
PB1	144	G	A	3642	3.66365	40	M>I	A/Swallow/Vietnam/NT22/2013	M>L: High-growth properties of influenza candidate vaccine virus	26334134
PB1	1670	A	G	5045	3.57319	549	Q>R	A/duck/Vietnam/QT1456-1/2012
PB1	1910	A	G	4482	3.49507	629	N>S	A/duck/Vietnam/QT1456-2/2012
PB1	1402	C	A	1692	3.11678	460	Q>K	A/duck/Vietnam/ST1490-1/2012
PB1	346	C	T	1791	2.61102	108	L>F	A/duck/Vietnam/ST1490-1/2012
PB1	1402	C	A	3868	2.5699	460	Q>K	A/duck/Vietnam/LS101/2013
PB1	2256	G	A	16963	2.45271	744	M>I	A/Duck/Vietnam/QT1727/2013	Differs within clade 2.3.4.1
PB1	2261	T	C	4161	2.43421	746	I>T	A/duck/Vietnam/ST1490-2/2012	Differs within clade 2.3.4.1
PB1	787	G	A	1125	2.38487	255	V>I	A/Duck/Vietnam/QT1727/2013
PB1	1777	T	G	5614	2.30263	585	S>A	A/duck/Vietnam/ST1490-1/2012
PB1	229	A	G	6555	2.26151	69	I>V	A/duck/Vietnam/ST1490-2/2012
PB1	118	C	T	2773	2.22451	32	H>Y	A/duck/Vietnam/LS101/2013
PB1	1992	A	C	53510	2.21217	656	E>D	A/Duck/Vietnam/QT1729/2013
PB1	622	G	A	1772	2.1875	200	V>I	A/Duck/Vietnam/QT1730/2013
PB1	1992	A	C	42536	2.16694	656	E>D	A/Duck/Vietnam/QT1730/2013
PB1	185	G	A	1729	2.12171	54	G>E	A/Duck/Vietnam/QT1726/2013	Differs between clade 1.1.2 and clades 2.3.2.1a, 2.3.2.1c (see Table S2)
PB1	136	T	A	1585	2.06414	38	Y>N	A/Duck/Vietnam/QT1726/2013	C>Y: Increased polymerase actitivity in avian cells and increased pathogenicity in chickens	25031333
PB1	1777	T	G	2866	2.0477	585	S>A	A/duck/Vietnam/ST1489-1/2012
PB1	1402	C	A	4966	1.94079	460	Q>K	A/duck/Vietnam/ST1490-2/2012
PB1	884	G	A	1882	1.89967	287	R>K	A/Duck/Vietnam/QT1730/2013
PB1	184	G	A	2029	1.75987	54	G>R	A/Duck/Vietnam/QT1726/2013	Differs between clade 1.1.2 and clades 2.3.2.1a, 2.3.2.1c (see Table S2)
PB1	1463	G	A	2312	1.75164	480	R>K	A/Swallow/Vietnam/NT24/2013	Differs within clade 2.3.2.1c (see Table S2)
PB1	1777	T	G	2831	1.75164	585	S>A	A/duck/Vietnam/ST1489-2/2012
PB1	1402	C	A	4311	1.7023	460	Q>K	A/duck/Vietnam/ST1491-3/2012
PB1	622	G	A	1865	1.59539	200	V>I	A/Duck/Vietnam/QT1729/2013
PB1	301	G	A	1569	1.57072	93	A>T	A/Duck/Vietnam/QT1730/2013
PB1	1402	C	A	6320	1.56661	460	Q>K	A/duck/Vietnam/ST1551-3/2012
PB1	884	G	A	2227	1.51727	287	R>K	A/Duck/Vietnam/QT1729/2013
PB1	1402	C	A	1498	1.51727	460	Q>K	A/duck/Vietnam/ST1489-2/2012
PB1	301	G	A	1733	1.48026	93	A>T	A/Duck/Vietnam/QT1729/2013
PB1	1777	T	G	2751	1.47615	585	S>A	A/duck/Vietnam/ST1489-3/2012
PB1	685	G	T	10839	1.4597	221	A>S	A/Muscovy duck/Vietnam/BG80-1/2013
PB1	74	C	T	1232	1.36102	17	A>V	A/duck/Vietnam/QT1457-3/2012
PB1	1463	G	A	7678	1.36102	480	R>K	A/Swallow/Vietnam/NT25/2013	Differs within clade 2.3.2.1c (see Table S2)
PB1	229	A	G	13440	1.28701	69	I>V	A/duck/Vietnam/ST1490-3/2012
PB1	2256	G	A	2755	1.21711	744	M>I	A/Duck/Vietnam/QT1726/2013	Differs within clade 2.3.4.1
PB1	1400	T	C	1680	1.16776	459	I>T	A/duck/Vietnam/ST1490-1/2012
PB1	1777	T	G	1688	1.16776	585	S>A	A/duck/Vietnam/ST1488-1/2012
PB1	1597	G	A	1177	1.09375	525	V>I	A/duck/Vietnam/QT1455-1/2012	Differs between clades 1.1.2, 2.3.2.1c and clade 2.3.2.1a (see Table S2)
PB1	190	A	G	1743	1.0773	56	T>A	A/duck/Vietnam/ST1490-1/2012	Differs within clade 2.3.2.1a (see Table S2)
PB1	2088	A	G	3412	1.03824	688	I>M	A/muscovy duck/LS154/2013
PB1	1402	C	A	16071	1.03207	460	Q>K	A/duck/Vietnam/ST1490-3/2012
PB1	1777	T	G	3081	1.02385	585	S>A	A/duck/Vietnam/ST1488-3/2012
PB1	2061	A	T	3188	1.02385	679	Q>H	A/duck/Vietnam/ST1488-3/2012
PB1	1405	G	A	6821	1.01768	461	A>T	A/Swallow/Vietnam/NT25/2013
PB1	1405	G	A	10549	1.01357	461	A>T	A/Swallow/Vietnam/NT22/2013
PB1_F2	185	G	T	1729	40.0822	23	G>C	A/Duck/Vietnam/QT1726/2013	Differs within clade 2.3.2.1c (see Table S2)
PB1_F2	121	T	G	1804	19.3914	1	I>M	A/muscovy duck/LS154/2013	Differs within clade 2.3.2.1c (see Table S2)
PB1_F2	225	C	T	22320	14.5374	36	T>I	A/Muscovy duck/Vietnam/BG80-2/2013
PB1_F2	244	C	A	1817	5.32072	42	Y>*	A/Duck/Vietnam/QT1727/2013
PB1_F2	144	G	A	3642	3.66365	9	W>*	A/Swallow/Vietnam/NT22/2013
PB1_F2	207	C	T	2083	3.05921	30	P>L	A/duck/Vietnam/ST1488-3/2012
PB1_F2	249	G	A	1021	2.92763	44	R>K	A/Duck/Vietnam/QT1726/2013
PB1_F2	185	G	A	1729	2.12171	23	G>S	A/Duck/Vietnam/QT1726/2013
PB1_F2	285	T	C	1538	1.93257	56	V>A	A/Swallow/Vietnam/NT25/2013
PB1_F2	171	T	C	1728	1.66118	18	I>T	A/Duck/Vietnam/QT1726/2013	Differs between clade 1.1.2 and clades 2.3.2.1a, 2.3.2.1c (see Table S2)
PB1_F2	228	G	T	1698	1.57895	37	R>L	A/Duck/Vietnam/QT1726/2013	Differs between clade 1.1.2 and clades 2.3.2.1a, 2.3.2.1c (see Table S2)
PB1_F2	301	G	A	1569	1.57072	61	W>*	A/Duck/Vietnam/QT1730/2013
PB1_F2	301	G	A	1733	1.48026	61	W>*	A/Duck/Vietnam/QT1729/2013
PB1_F2	150	A	G	1963	1.25822	11	Q>R	A/Duck/Vietnam/QT1726/2013	Differs between clade 1.1.2 and clades 2.3.2.1a, 2.3.2.1c (see Table S2)
PB1_F2	120	T	C	1799	1.04852	1	M>T	A/duck/Vietnam/ST1488-3/2012	Differs within clade 2.3.2.1c (see Table S2)
PB1_F2	183	A	G	2722	1.01562	22	E>G	A/Swallow/Vietnam/NT22/2013	Differs within clade 2.3.2.1c (see Table S2)
PA	1063	A	G	4930	30.4441	347	N>D	A/Swallow/Vietnam/NT25/2013	Differs within clade 2.3.2.1c (see Table S2)	29212927
									D>E: Increased replicative ability and virulence of H5N1 viruses	29212927
PA	1636	G	A	6570	14.9507	538	E>K	A/duck/Vietnam/QT1456-3/2012	Differs within clade 2.3.2.1a (see Table S2)
PA	1367	C	A	5271	11.0691	448	A>E	A/Swallow/Vietnam/NT22/2013
PA	323	T	C	16851	10.1234	100	V>A	A/Duck/Vietnam/QT1726/2013
PA	1456	G	A	1730	9.35855	478	D>N	A/duck/Vietnam/QT1457-2/2012
PA	1496	C	T	3168	8.2648	491	T>I	A/duck/Vietnam/QT1484/2012
PA	160	T	A	2090	7.06414	46	F>I	A/duck/Vietnam/QT1479/2012
PA	1228	T	G	33217	6.82155	402	S>A	A/muscovy duck/LS154/2013
PA	2086	G	A	22077	6.23355	688	E>K	A/duck/Vietnam/LS101/2013
PA	1904	G	C	2131	4.67105	627	G>A	A/duck/Vietnam/QT1457-2/2012
PA	500	C	T	6084	4.52303	159	A>V	A/duck/Vietnam/ST1490-1/2012
PA	83	C	A	1485	4.41612	20	T>K	A/duck/Vietnam/QT1457-2/2012	Differs between clade 1.1.2 and clades 2.3.2.1a, 2.3.2.1c (see Table S2)
PA	161	T	G	1970	4.34211	46	F>C	A/duck/Vietnam/QT1479/2012
PA	2158	A	G	1185	4.11184	712	T>A	A/duck/Vietnam/QT1455-2/2012	Differs between clade 1.1.2 and clades 2.3.2.1a, 2.3.2.1c (see Table S2)
PA	1972	T	C	6409	4.03783	650	Y>H	A/duck/Vietnam/ST1489-3/2012
PA	1915	A	T	1117	3.91447	631	S>C	A/duck/Vietnam/QT1483/2012	Differs between clade 1.1.2 and clades 2.3.2.1a, 2.3.2.1c (see Table S2)
PA	166	T	C	4348	3.75411	48	Y>H	A/duck/Vietnam/ST1489-3/2012
PA	142	A	T	1088	3.47862	40	T>S	A/duck/Vietnam/QT1483/2012
PA	1637	A	G	6175	3.38816	538	E>G	A/duck/Vietnam/ST1490-1/2012
PA	2029	G	A	6118	3.32237	669	V>I	A/duck/Vietnam/ST1489-1/2012
PA	2155	A	C	1379	3.24013	711	I>L	A/duck/Vietnam/QT1455-2/2012	Differs within clade 2.3.2.1a (see Table S2)
PA	2075	G	A	4962	3.17434	684	G>E	A/duck/Vietnam/ST1489-1/2012	Differs within clade 2.3.4.1 (see Table S2)
PA	1903	G	C	2094	3.07977	627	G>R	A/duck/Vietnam/QT1457-2/2012
PA	955	A	G	6622	2.98931	311	M>V	A/Duck/Vietnam/QT1727/2013
PA	688	C	A	4538	2.76316	222	H>N	A/Swallow/Vietnam/NT25/2013	Differs within clade 2.3.2.1c (see Table S2)
PA	1971	A	T	6356	2.76316	649	L>F	A/duck/Vietnam/ST1489-3/2012
PA	1421	G	A	5317	2.71382	466	S>N	A/Swallow/Vietnam/NT25/2013	Differs within clade 2.3.2.1c (see Table S2)
PA	2158	A	G	2888	2.57401	712	T>A	A/duck/Vietnam/QT1455-1/2012	Differs between clade 1.1.2 and clades 2.3.2.1a, 2.3.2.1c (see Table S2)
PA	314	T	C	4593	2.46711	97	I>T	A/Swallow/Vietnam/NT25/2013	Differs within clade 2.3.2.1c (see Table S2)
									T>I: Increased replicative ability of H5 viruses	26082035, 19793828
PA	85	A	G	1463	2.43421	21	M>V	A/duck/Vietnam/QT1457-2/2012
PA	1651	C	T	33544	2.4301	543	L>F	A/muscovy duck/LS154/2013
PA	448	A	G	20292	2.38487	142	R>G	A/Duck/Vietnam/QT1726/2013	Differs between clade 2.3.4.1 and clades 1.1.2, 2.3.2.1a, 2.3.2.1c (see Table S2)
PA	2155	A	C	3295	2.1875	711	I>L	A/duck/Vietnam/QT1455-1/2012	Differs within clade 2.3.2.1a (see Table S2)
PA	1988	T	A	4786	2.15872	655	L>H	A/duck/Vietnam/QT1479/2012
PA	86	T	A	1408	2.09704	21	M>K	A/duck/Vietnam/QT1457-2/2012
PA	2003	C	A	4557	1.89556	660	A>D	A/duck/Vietnam/QT1457-2/2012
PA	193	C	T	1933	1.84622	57	R>*	A/duck/Vietnam/QT1457-2/2012	Computationally predicted to be host-specific	17073083; 17652405; 20140252
PA	1432	T	A	26418	1.75473	470	L>M	A/Muscovy duck/Vietnam/BG80-2/2013
PA	1276	A	G	1738	1.71875	418	T>A	A/duck/Vietnam/QT1457-2/2012
PA	840	G	T	5021	1.59539	272	E>D	A/Swallow/Vietnam/NT25/2013	Differs among clades 1.1.2, 2.3.2.1a, 2.3.2.1c (see Table S2)
PA	162	C	A	1851	1.59128	46	F>L	A/duck/Vietnam/QT1479/2012
PA	1624	C	T	26166	1.56764	534	P>S	A/Muscovy duck/Vietnam/BG80-1/2013
PA	371	G	A	5973	1.54605	116	R>Q	A/duck/Vietnam/QT1456-3/2012
PA	1970	T	A	3156	1.50493	649	L>Q	A/duck/Vietnam/QT1484/2012
PA	611	G	A	6375	1.4926	196	R>K	A/Duck/Vietnam/QT1727/2013
PA	331	C	T	4392	1.46587	103	P>S	A/Swallow/Vietnam/NT22/2013
PA	1686	A	G	5428	1.4597	554	I>M	A/Swallow/Vietnam/NT25/2013	Differs between clade 1.1.2 and clades 2.3.2.1a, 2.3.2.1c (see Table S2)
PA	690	C	A	4820	1.43709	222	H>Q	A/Swallow/Vietnam/NT22/2013	Differs within clade 2.3.2.1c (see Table S2)
PA	248	G	A	12476	1.43298	75	R>Q	A/Duck/Vietnam/QT1729/2013
PA	212	T	C	7024	1.42681	63	V>A	A/Swallow/Vietnam/NT25/2013
PA	1987	C	G	4663	1.4227	655	L>V	A/duck/Vietnam/QT1479/2012
PA	248	G	A	10157	1.42064	75	R>Q	A/Duck/Vietnam/QT1730/2013
PA	169	T	C	4329	1.41242	49	S>P	A/duck/Vietnam/ST1489-3/2012
PA	1913	A	T	1111	1.3199	630	E>V	A/duck/Vietnam/QT1483/2012
PA	1873	G	T	1719	1.31579	617	E>*	A/duck/Vietnam/QT1457-2/2012
PA	184	A	G	2793	1.26645	54	I>V	A/duck/Vietnam/QT1484/2012
PA	260	T	A	1589	1.23766	79	I>N	A/duck/Vietnam/QT1457-2/2012
PA	1912	G	A	1129	1.21299	630	E>K	A/duck/Vietnam/QT1483/2012
PA	87	G	A	1472	1.19243	21	M>I	A/duck/Vietnam/QT1457-2/2012
PA	196	G	A	17627	1.15954	58	G>S	A/Muscovy duck/Vietnam/BG80-2/2013	Differs between clade 1.1.2 and clades 2.3.2.1a, 2.3.2.1c (see Table S2)
PA	688	C	A	4501	1.11842	222	H>N	A/Swallow/Vietnam/NT22/2013	Differs within clade 2.3.2.1c (see Table S2)
PA	194	G	C	1911	1.08141	57	R>P	A/duck/Vietnam/QT1457-2/2012	Computationally predicted to be host-specific	17073083; 17652405; 20140252
PA	1094	T	C	3932	1.0773	357	I>T	A/duck/Vietnam/ST1490-1/2012	Differs between clade 1.1.2 and clades 2.3.2.1a, 2.3.2.1c (see Table S2)
PA	409	A	G	2961	1.06086	129	T>A	A/duck/Vietnam/ST1488-1/2012	Differs between clade 1.1.2 and clades 2.3.2.1a, 2.3.2.1c (see Table S2)
PA	2159	C	A	9008	1.01151	712	T>K	A/duck/Vietnam/QT1457-2/2012	Differs between clade 1.1.2 and clades 2.3.2.1a, 2.3.2.1c (see Table S2)
PA	1901	A	C	2027	1.00625	626	K>T	A/duck/Vietnam/QT1457-2/2012
HA	1080	T	A	1774	49.5518	336	I>K	A/duck/Vietnam/QT1456-2/2012
HA	731	A	G	3486	47.9605	219	I>V	A/duck/Vietnam/ST1488-1/2012	Differs among clades 1.1.2, 2.3.2.1a, 2.3.2.1c (see Table S2)
									Receptor-binding site
HA	292	G	T	3529	47.2111	72	K>N	A/duck/Vietnam/ST1488-1/2012	Differs within clade 1.1.2 (see Table S2)
HA	497	T	C	2281	38.8425	141	S>P	A/duck/Vietnam/QT1480/2012	Rim of receptor-binding site
									S>P/Y/F/T: Affects H5 HA fusion and heat stability, and virulence	24210119
									Differs between clade 2.3.4.1 and clades 1.1.2, 2.3.2.1a, 2.3.2.1c (see Table S2)
HA	1148	G	A	1883	36.8565	359	E>K	A/duck/Vietnam/QT1479/2012
HA	731	G	A	10018	36.6406	219	V>I	A/duck/Vietnam/ST1488-2/2012	Receptor-binding site
									Differs among clades 1.1.2, 2.3.2.1a, 2.3.2.1c (see Table S2)
HA	292	T	G	10115	36.029	72	N>K	A/duck/Vietnam/ST1488-2/2012	Differs within clade 1.1.2 (see Table S2)
HA	1080	T	A	1233	35.8491	336	I>K	A/duck/Vietnam/QT1455-3/2012
HA	1080	T	A	1712	35.4533	336	I>K	A/duck/Vietnam/QT1456-1/2012
HA	1080	T	A	1032	30.7155	336	I>K	A/duck/Vietnam/QT1457-1/2012
HA	474	C	A	1724	30.0987	133	A>E	A/duck/Vietnam/QT1456-3/2012	Rim of receptor-binding site
									S>A (combined with other mutations): Affects H5 HA receptor-binding	17690300
									Differs between clade 2.3.4.1 and clades 1.1.2, 2.3.2.1a, 2.3.2.1c (see Table S2)
HA	1148	G	A	2116	27.8834	359	E>K	A/duck/Vietnam/QT1455-3/2012
HA	1355	C	A	77753	25.9534	428	L>I	A/Swallow/Vietnam/NT25/2013
HA	752	G	A	2606	24.707	226	V>I	A/duck/Vietnam/QT1483/2012	Differs between clade 1.1.2 and clades 2.3.2.1a, 2.3.2.1c (see Table S2)
									Receptor-binding site
HA	1148	G	A	2629	24.1879	359	E>K	A/duck/Vietnam/QT1456-1/2012
HA	1083	T	A	6503	23.051	336	I>K	A/duck/Vietnam/ST1490-1/2012
HA	1080	T	A	4419	22.8043	336	I>K	A/duck/Vietnam/QT1483/2012
HA	731	G	A	9112	22.3684	219	V>I	A/duck/Vietnam/ST1488-3/2012	Receptor-binding site
									Differs among clades 1.1.2, 2.3.2.1a, 2.3.2.1c (see Table S2)
HA	1148	G	A	1374	22.1957	359	E>K	A/duck/Vietnam/QT1455-2/2012
HA	1148	G	A	2730	21.9408	359	E>K	A/duck/Vietnam/QT1456-2/2012
HA	292	T	G	9043	21.5543	72	N>K	A/duck/Vietnam/ST1488-3/2012	Differs within clade 1.1.2 (see Table S2)
HA	1148	G	A	1578	18.9474	359	E>K	A/duck/Vietnam/QT1457-1/2012
HA	1080	T	A	3767	18.7664	336	I>K	A/duck/Vietnam/QT1484/2012
HA	287	A	G	23246	18.4211	71	T>A	A/Muscovy duck/Vietnam/BG80-2/2013	Differs between clades 1.1.2, 2.3.2.1a, and clade 2.3.2.1c (see Table S2)
HA	1148	G	A	2464	17.9729	359	E>K	A/duck/Vietnam/QT1457-3/2012
HA	1083	T	A	44352	17.646	336	I>K	A/duck/Vietnam/ST1491-2/2012
HA	1421	G	A	29574	16.8627	450	D>N	A/Muscovy duck/Vietnam/BG80-2/2013
HA	1080	T	A	1793	16.5049	336	I>K	A/duck/Vietnam/QT1457-3/2012
HA	467	G	A	1781	16.2212	131	V>M	A/duck/Vietnam/QT1456-3/2012	Rim of receptor-binding site
HA	1083	T	A	49615	15.2714	336	I>K	A/duck/Vietnam/ST1491-1/2012
HA	1080	T	A	34412	14.3339	336	I>K	A/Duck/Vietnam/QT1729/2013
HA	1083	T	A	5740	13.0572	336	I>K	A/duck/Vietnam/ST1489-2/2012
HA	1080	T	A	1470	12.3109	336	I>K	A/duck/Vietnam/QT1481/2012
HA	1080	T	A	32148	11.3672	336	I>K	A/Duck/Vietnam/QT1730/2013
HA	1083	T	A	44498	11.1349	336	I>K	A/duck/Vietnam/ST1490-3/2012
HA	1080	T	A	19317	10.5592	336	I>K	A/Duck/Vietnam/QT1727/2013
HA	1083	T	A	50721	10.2303	336	I>K	A/duck/Vietnam/ST1490-2/2012
HA	264	G	A	1100	10.0822	63	G>E	A/duck/Vietnam/QT1457-3/2012
HA	1080	T	A	13596	9.96711	336	I>K	A/Duck/Vietnam/QT1728/2013
HA	1148	G	A	1856	9.85197	359	E>K	A/duck/Vietnam/QT1481/2012
HA	738	G	A	2773	9.65461	221	G>E	A/duck/Vietnam/QT1457-2/2012	Receptor-binding site
									G>D (combined with other mutations): Affects H5 HA receptor binding	16543414
HA	1002	A	C	3383	9.56414	309	N>T	A/duck/Vietnam/QT1483/2012	Differs between clade 1.1.2 and clades 2.3.2.1a, 2.3.2.1c (see Table S2)
HA	1148	G	A	5913	9.11184	359	E>K	A/duck/Vietnam/QT1483/2012
HA	1083	T	A	46436	7.20395	336	I>K	A/duck/Vietnam/ST1551-3/2012
HA	1083	T	A	3691	6.98191	336	I>K	A/duck/Vietnam/ST1488-1/2012
HA	1083	T	A	10855	6.74342	336	I>K	A/duck/Vietnam/ST1489-3/2012
HA	1083	T	A	7254	6.69408	336	I>K	A/duck/Vietnam/ST1489-1/2012
HA	1080	T	A	1306	5.19737	336	I>K	A/duck/Vietnam/QT1458-2/2012
HA	1080	T	A	41117	4.77796	336	I>K	A/Duck/Vietnam/QT1726/2013
HA	1083	T	A	72476	4.7574	336	I>K	A/duck/Vietnam/ST1491-3/2012
HA	1148	G	A	1439	4.58059	359	E>K	A/duck/Vietnam/QT1458-2/2012
HA	1080	T	A	9758	4.49836	336	I>K	A/Muscovy duck/Vietnam/BG80-1/2013
HA	906	G	A	8637	4.14474	277	R>K	A/Muscovy duck/Vietnam/BG80-1/2013	Differs between clade 1.1.2 and clades 2.3.2.1a, 2.3.2.1c (see Table S2)
HA	537	A	G	7601	3.90625	154	D>G	A/Muscovy duck/Vietnam/BG80-1/2013	Rim of receptor-binding site
									N154S (combined with other mutations): Affects receptor binding of H5 HA	18404209, 20392847
									Differs between clade 1.1.2 and clades 2.3.2.1a, 2.3.2.1c (see Table S2)
HA	1083	T	A	9916	3.74178	336	I>K	A/duck/Vietnam/ST1488-2/2012
HA	1083	T	A	8973	3.49507	336	I>K	A/duck/Vietnam/ST1488-3/2012
HA	1148	G	A	3344	3.49095	359	E>K	A/duck/Vietnam/QT1458-1/2012
HA	257	C	A	59749	3.47451	61	L>I	A/Swallow/Vietnam/NT25/2013
HA	1080	T	A	1908	3.39638	336	I>K	A/duck/Vietnam/QT1458-3/2012
HA	1148	G	A	2184	3.33059	359	E>K	A/duck/Vietnam/QT1458-3/2012
HA	569	A	C	67627	3.31209	165	N>H	A/Swallow/Vietnam/NT25/2013	Differs within clade 2.3.2.1c (see Table S2)
HA	1148	G	A	2230	3.17434	359	E>K	A/duck/Vietnam/QT1456-3/2012
HA	1080	T	A	3031	3.09211	336	I>K	A/duck/Vietnam/QT1458-1/2012
HA	1080	T	A	3670	2.93586	336	I>K	A/duck/Vietnam/QT1457-2/2012
HA	1080	T	A	39275	2.88857	336	I>K	A/Swallow/Vietnam/NT22/2013
HA	447	A	C	59239	2.75596	124	D>A	A/Swallow/Vietnam/NT24/2013	Differs between clade 1.1.2 and clades 2.3.2.1a, 2.3.2.1c (see Table S2)
HA	1151	G	A	8057	2.54934	360	E>K	A/duck/Vietnam/ST1490-1/2012
HA	1148	G	A	4260	2.50411	359	E>K	A/duck/Vietnam/QT1457-2/2012
HA	1191	A	G	27162	2.44655	373	K>R	A/duck/Vietnam/LS101/2013
HA	524	C	T	1273	2.34375	150	L>F	A/duck/Vietnam/QT1457-3/2012	Rim of receptor-binding site
HA	120	A	C	3390	2.32319	15	K>T	A/duck/Vietnam/ST1490-1/2012	Differs between clade 1.1.2 and clades 2.3.2.1a, 2.3.2.1c (see Table S2)
HA	1080	T	A	75061	2.29749	336	I>K	A/Swallow/Vietnam/NT25/2013
HA	1672	G	A	6880	2.09293	533	M>I	A/duck/Vietnam/LS101/2013	Differs between clade 1.1.2 and clades 2.3.2.1a, 2.3.2.1c (see Table S2)
HA	1080	T	A	2146	2.08882	336	I>K	A/duck/Vietnam/QT1456-3/2012
HA	1148	G	A	2905	1.85033	359	E>K	A/duck/Vietnam/QT1480/2012
HA	1147	T	A	1850	1.76809	358	N>K	A/duck/Vietnam/QT1479/2012
HA	513	A	C	2413	1.68586	146	N>T	A/duck/Vietnam/QT1458-1/2012
HA	1392	A	T	1474	1.67763	440	Y>F	A/duck/Vietnam/QT1455-1/2012	Differs within clade 2.3.2.1a (see Table S2)
HA	1147	T	A	1547	1.66941	358	N>K	A/duck/Vietnam/QT1457-1/2012
HA	582	G	A	15727	1.60362	169	R>Q	A/Duck/Vietnam/QT1727/2013	Differs between clades 1.1.2, 2.3.2.1a and clade 2.3.2.1c (see Table S2)
HA	1151	G	A	6989	1.52138	360	E>K	A/duck/Vietnam/ST1489-2/2012
HA	74	A	G	41722	1.49157	signal peptide	S>G	A/Swallow/Vietnam/NT24/2013
HA	168	A	G	12907	1.4412	31	D>G	A/Duck/Vietnam/QT1728/2013
HA	1080	T	A	46831	1.44017	336	I>K	A/muscovy duck/LS154/2013
HA	562	A	C	2319	1.41036	162	K>N	A/duck/Vietnam/QT1458-1/2012	R>G: Reduced H5 stability	26220479
									Differs between clade 1.1.2 and clades 2.3.2.1a, 2.3.2.1c (see Table S2)
HA	1080	T	A	2622	1.36513	336	I>K	A/duck/Vietnam/QT1480/2012
HA	1158	G	A	40355	1.33429	362	S>N	A/muscovy duck/LS154/2013
HA	1147	T	A	2085	1.33224	358	N>K	A/duck/Vietnam/QT1455-3/2012
HA	1080	T	A	31554	1.25822	336	I>K	A/Muscovy duck/Vietnam/BG80-2/2013
HA	1104	G	A	1109	1.25	344	W>*	A/duck/Vietnam/QT1457-1/2012
HA	1147	T	A	1355	1.24178	358	N>K	A/duck/Vietnam/QT1455-2/2012
HA	500	T	C	2393	1.23355	142	S>P	A/duck/Vietnam/QT1458-1/2012	Rim of receptor-binding site
HA	425	A	G	14677	1.22122	117	I>V	A/Duck/Vietnam/QT1727/2013
HA	564	G	A	1491	1.20066	163	G>D	A/duck/Vietnam/QT1458-3/2012	Differs between clade 1.1.2 and clades 2.3.2.1a, 2.3.2.1c (see Table S2)
HA	1194	A	G	72000	1.15646	373	K>R	A/duck/Vietnam/ST1491-3/2012
HA	1104	G	A	1926	1.12664	344	W>*	A/duck/Vietnam/QT1456-2/2012
HA	1147	T	A	2680	1.10197	358	N>K	A/duck/Vietnam/QT1456-2/2012
HA	1079	A	G	33903	1.07216	336	I>V	A/Duck/Vietnam/QT1729/2013
HA	512	A	G	3243	1.06908	146	N>D	A/duck/Vietnam/QT1457-2/2012
HA	1147	T	A	2582	1.06908	358	N>K	A/duck/Vietnam/QT1456-1/2012
HA	1079	A	G	31773	1.06497	336	I>V	A/Duck/Vietnam/QT1730/2013
HA	1148	G	A	4087	1.06497	359	E>K	A/duck/Vietnam/QT1484/2012
HA	203	G	A	3014	1.05263	43	D>N	A/duck/Vietnam/QT1457-2/2012	Differs within clade 2.3.2.1c (see Table S2)
HA	1166	G	A	21652	1.01768	365	A>T	A/Duck/Vietnam/QT1727/2013
HA	1103	T	A	1071	1.01151	343	W>R	A/duck/Vietnam/QT1457-1/2012
HA	1279	C	A	3455	1.00329	412	N>K	A/duck/Vietnam/QT1484/2012
NP	1157	C	T	5260	17.9729	371	T>M	A/Duck/Vietnam/QT1726/2013	Differs between clades 1.1.2, 2.3.2.1a and clade 2.3.2.1c (see Table S2)
NP	359	T	A	1945	5.53454	105	M>K	A/duck/Vietnam/ST1489-1/2012	A>V: Increased virulence of H5N1 in chickens	21123376
									Differs between clade 1.1.2 and clades 2.3.2.1a, 2.3.2.1c (see Table S2)
NP	991	A	G	11062	5.25082	316	I>V	A/Swallow/Vietnam/NT22/2013
NP	343	A	G	1769	3.20724	100	R>G	A/duck/Vietnam/ST1489-2/2012
NP	503	C	T	10517	2.7241	153	A>V	A/Duck/Vietnam/QT1727/2013
NP	684	A	T	1085	2.56579	213	R>S	A/duck/Vietnam/QT1455-3/2012	RNA-binding site	17151603
NP	359	T	A	2010	2.52467	105	M>K	A/duck/Vietnam/ST1489-2/2012	A>V: Increased virulence of H5N1 in chickens	21123376
									Differs between clade 1.1.2 and clades 2.3.2.1a, 2.3.2.1c (see Table S2)
NP	359	T	C	13500	2.44449	105	M>T	A/duck/Vietnam/ST1491-2/2012	A>V: Increased virulence of H5N1 in chickens	21123376
									Differs between clade 1.1.2 and clades 2.3.2.1a, 2.3.2.1c (see Table S2)
NP	359	T	C	11918	2.09087	105	M>T	A/duck/Vietnam/ST1491-3/2012	A>V: Increased virulence of H5N1 in chickens	21123376
									Differs between clade 1.1.2 and clades 2.3.2.1a, 2.3.2.1c (see Table S2)
NP	1402	G	C	1635	1.81743	453	A>P	A/muscovy duck/LS154/2013	P: Forms hydrophobic interaction with neighboring monomer	17151603
									Differs within clade 2.3.2.1c (see Table S2)
NP	343	A	G	1738	1.53783	100	R>G	A/duck/Vietnam/ST1489-1/2012
NP	556	A	G	3456	1.48849	171	T>A	A/duck/Vietnam/ST1489-3/2012
NP	359	T	C	6768	1.3898	105	M>T	A/duck/Vietnam/ST1491-1/2012	A>V: Increased virulence of H5N1 in chickens	21123376
									Differs between clade 1.1.2 and clades 2.3.2.1a, 2.3.2.1c (see Table S2)
NP	611	T	G	1155	1.37336	189	M>R	A/Swallow/Vietnam/NT25/2013
NP	204	A	T	1719	1.32812	53	E>D	A/duck/Vietnam/ST1489-1/2012
NP	601	G	A	1141	1.21711	186	V>I	A/Swallow/Vietnam/NT25/2013	Differs between clade 1.1.2 and clades 2.3.2.1a, 2.3.2.1c (see Table S2)
NA	755	T	G	3538	43.3553	245(265)	N>K	A/duck/Vietnam/QT1481/2012	Differs within clade 2.3.2.1a (see Table S2)
NA	121	T	C	1457	38.9792	34	V>A	A/duck/Vietnam/QT1480/2012
NA	455	G	T	3201	10.4523	145(165)	E>D	A/duck/Vietnam/QT1458-1/2012
NA	942	C	T	2272	8.9227	308(328)	P>S	A/duck/Vietnam/QT1484/2012	Antigenic site	6188957
NA	703	A	G	1871	1.91612	228(248)	N>S	A/duck/Vietnam/QT1484/2012
NA	282	A	G	1308	1.82566	88(108)	I>V	A/duck/Vietnam/QT1458-2/2012
NA	526	G	A	4596	1.81332	169(189)	S>N	A/duck/Vietnam/QT1457-2/2012
NA	306	G	A	8902	1.71875	96(116)	V>I	A/duck/Vietnam/ST1490-1/2012	V>A: Reduced sensitivity to Oseltamivir and Zanamivir	20016036, 17112602
NA	778	A	G	15084	1.58923	253(273)	N>S	A/duck/Vietnam/LS101/2013	N1 antigenic site	23785204
NA	1015	A	G	21945	1.41036	332(352)	K>R	A/muscovy duck/LS154/2013
NA	556	A	G	2701	1.39803	179(199)	D>G	A/duck/Vietnam/QT1480/2012
NA	843	A	G	2371	1.38158	275(295)	N>D	A/duck/Vietnam/QT1480/2012
NA	1207	A	G	1684	1.29112	396(416)	D>G	A/duck/Vietnam/QT1479/2012
NA	237	C	T	1959	1.21711	73(93)	P>S	A/duck/Vietnam/QT1484/2012
NA	455	G	T	1565	1.20066	145(165)	E>D	A/duck/Vietnam/QT1458-2/2012
NA	455	G	T	7233	1.1986	145(165)	E>D	A/duck/Vietnam/QT1457-3/2012
NA	834	T	A	2288	1.12664	272(292)	C>S	A/duck/Vietnam/QT1456-2/2012
NA	852	G	A	1999	1.09375	278(298)	G>S	A/duck/Vietnam/QT1484/2012
M1	450	T	C	10698	12.2327	142	V>A	A/duck/Vietnam/QT1458-2/2012
M1	638	G	A	1042	11.8832	205	V>I	A/Swallow/Vietnam/NT24/2013	V>I: Contributes to high-growth properties	7966605
									Differs among clades 1.1.2, 2.3.2.1a, 2.3.2.1c (see Table S2)
M1	102	A	G	15643	1.68997	26	Q>R	A/duck/Vietnam/ST1489-2/2012
M1	638	G	A	2929	1.68997	205	V>I	A/Swallow/Vietnam/NT25/2013	V>I: Contributes to high-growth properties	7966605
									Differs among clades 1.1.2, 2.3.2.1a, 2.3.2.1c (see Table S2)
M1	153	T	C	17467	1.64679	43	M>T	A/duck/Vietnam/QT1458-1/2012	I>M: Increased virulence of H5N1 in chickens and ducks	26368015
M1	330	A	G	15932	1.09375	102	K>R	A/duck/Vietnam/QT1456-3/2012	K: Part of late domain motif	12768027
									Residue is involved in RNA binding	9164466
M1	725	C	A	95800	1.08347	234	L>I	A/muscovy duck/LS154/2013
M1	528	T	C	1181	1.00329	168	I>T	A/Swallow/Vietnam/NT24/2013	Potential phosphorylation site	23144613
M2	792	A	G	1462	14.2845	27	I>V	A/Swallow/Vietnam/NT24/2013	V>A: Decreased sensitivity to ion channel inhibitors	4065098
									Differs within clade 2.3.2.1.c (see Table S2)
M2	976	A	G	24115	11.3528	88	D>G	A/duck/Vietnam/QT1457-2/2012
M2	792	A	G	3769	11.1842	27	I>V	A/Swallow/Vietnam/NT25/2013	V>A: Decreased sensitivity to ion channel inhibitors	4065098
									Differs within clade 2.3.2.1.c (see Table S2)
M2	745	C	T	3477	10.6579	11	T>I	A/Swallow/Vietnam/NT25/2013	Differs within clade 2.3.2.1c (see Table S2)
M2	805	G	A	1473	10.3783	31	S>N	A/Swallow/Vietnam/NT24/2013	S>N: Resistance to ion channel inhibitors	4065098
									Differs between clade 1.1.2 and clades 2.3.2.1a, 2.3.2.1c (see Table S2)
M2	789	C	A	1447	10.0082	26	L>I	A/Swallow/Vietnam/NT24/2013	L>F: Decreased sensitivity to ion channel inhibitors	3793659
									Differs between clade 1.1.2 and clades 2.3.2.1a, 2.3.2.1c (see Table S2)
M2	978	G	A	3476	9.53947	89	G>S	A/Swallow/Vietnam/NT25/2013	S: Minor phosphorylation site	7529332
									Differs within clade 2.3.2.1c (see Table S2)
M2	997	A	G	3543	9.35855	95	E>G	A/Swallow/Vietnam/NT25/2013	Differs within clade 2.3.2.1c (see Table S2)
M2	958	A	G	1138	9.02961	82	N>S	A/Swallow/Vietnam/NT24/2013	S: Minor phosphorylation site	7529332
M2	745	C	T	1446	5.03289	11	T>I	A/Swallow/Vietnam/NT24/2013	Differs within clade 2.3.2.1c (see Table S2)
M2	997	A	G	1370	4.5148	95	E>G	A/Swallow/Vietnam/NT24/2013	Differs within clade 2.3.2.1c (see Table S2)
M2	978	G	A	1343	4.2352	89	G>S	A/Swallow/Vietnam/NT24/2013	S: Minor phosphorylation site	7529332
									Differs within clade 2.3.2.1c (see Table S2)
M2	789	C	A	3704	1.82155	26	L>I	A/Swallow/Vietnam/NT25/2013	L>F: Decreased sensitivity to ion channel inhibitors	3793659
									Differs between clade 1.1.2 and clades 2.3.2.1a, 2.3.2.1c (see Table S2)
M2	805	G	A	3787	1.78043	31	S>N	A/Swallow/Vietnam/NT25/2013	S>N: Resistance to ion channel inhibitors	4065098
									Differs between clade 1.1.2 and clades 2.3.2.1a, 2.3.2.1c (see Table S2)
M2	760	A	G	3504	1.7023	16	E>G	A/Swallow/Vietnam/NT25/2013	Differs within clade 2.3.2.1c (see Table S2)
M2	894	A	G	54158	1.62007	61	R>G	A/Muscovy duck/Vietnam/BG80-1/2013
M2	958	A	G	3043	1.25	82	N>S	A/Swallow/Vietnam/NT25/2013	S: Minor phosphorylation site	7529332
M2	792	A	G	19215	1.21299	27	I>V	A/Swallow/Vietnam/NT22/2013	V>A: Decreased sensitivity to ion channel inhibitors	4065098
									Differs within clade 2.3.2.1.c (see Table S2)
M2	760	A	G	1425	1.1102	16	E>G	A/Swallow/Vietnam/NT24/2013	Differs within clade 2.3.2.1c (see Table S2)
NS1	75	C	T	58915	4.07998	17	H>Y	A/duck/Vietnam/QT1458-2/2012
NS1	141	G	A	16277	3.96176	39	D>N	A/duck/Vietnam/QT1484/2012
NS1	75	C	T	76499	2.26974	17	H>Y	A/duck/Vietnam/QT1458-1/2012
NS1	576	G	A	128887	2.20292	184(189)	D>N	A/Muscovy duck/Vietnam/BG80-1/2013
NS1	299	A	C	42625	2.02919	91(96)	E>D	A/duck/Vietnam/QT1458-2/2012	Differs within clade 2.3.2.1c (see Table S2)
NS1	636	G	A	36266	1.99527	204(209)	V>I	A/duck/Vietnam/ST1490-1/2012	Differs between clade 1.1.2 and clades 2.3.2.1a, 2.3.2.1c (see Table S2)
NS1	612	T	C	59863	1.61287	196(201)	F>L	A/duck/Vietnam/QT1479/2012
NS1	585	G	A	49485	1.59642	187(192)	V>I	A/duck/Vietnam/QT1456-1/2012
NS1	274	G	T	59730	1.51316	83(88)	R>L	A/duck/Vietnam/QT1457-2/2012	Differs within clade 2.3.2.1c (see Table S2)
NS1	687	A	G	232361	1.3384	221(226)	I>V	A/duck/Vietnam/LS101/2013	Amino acid at this position affect antiviral responses	22419161
NS1	652	T	A	54101	1.33429	209(214)	L>H	A/duck/Vietnam/QT1457-3/2012
NS1	264	C	T	58330	1.29934	80(85)	P>S	A/duck/Vietnam/QT1479/2012	Differs between clade 2.3.4.1 and clades 1.1.2, 2.3.2.1a, 2.3.2.1c (see Table S2)
NS1	243	C	T	416987	1.27287	73	P>S	A/Swallow/Vietnam/NT25/2013	Differs among clades 1.1.2, 2.3.2.1a, 2.3.2.1c (see Table S2)
NS1	615	G	A	295436	1.08553	197(202)	A>T	A/duck/Vietnam/LS101/2013
NS2	560	A	G	60415	9.72451	26	E>G	A/duck/Vietnam/QT1457-3/2012	G>E: Recurring mutation in PR8 vaccine viruses	23776579
NS2	756	A	C	30821	3.09622	91	E>D	A/Muscovy duck/Vietnam/BG80-2/2013
NS2	576	G	A	128887	2.20292	31	M>I	A/Muscovy duck/Vietnam/BG80-1/2013
NS2	826	A	G	16666	1.53783	115	T>A	A/duck/Vietnam/ST1551-3/2012	Differs between clade 1.1.2 and clades 2.3.2.1a, 2.3.2.1c (see Table S2)
NS2	826	A	G	91050	1.3898	115	T>A	A/duck/Vietnam/ST1490-2/2012	Differs between clade 1.1.2 and clades 2.3.2.1a, 2.3.2.1c (see Table S2)
NS2	652	T	A	54101	1.33429	57	S>T	A/duck/Vietnam/QT1457-3/2012
NS2	835	T	C	24637	1.28495	118	F>L	A/duck/Vietnam/ST1489-1/2012	Differs between clade 1.1.2 and clades 2.3.2.1a, 2.3.2.1c (see Table S2)
NS2	826	A	G	26562	1.19552	115	T>A	A/duck/Vietnam/ST1491-3/2012	Differs between clade 1.1.2 and clades 2.3.2.1a, 2.3.2.1c (see Table S2)
*For HA, amino acid positions are based on the sequence of A/Vietnam/1203/2004 (Burke et al., 2014 (21)); for NA and NS1, the positions of proteins possessing or not possessing 20- or 4-amino acid deletions, respectively, are shown.
